1           **Metabolic selection of a homologous recombination mediated loss of glycosomal**  
2                                   **fumarate reductase in *Trypanosoma brucei***

3  
4  
5           Marion Wargnies<sup>1,2#</sup>, Nicolas Plazolles<sup>1#</sup>, Robin Schenk<sup>3</sup>, Oriana Villafranz<sup>1</sup>, Jean-William Dupuy<sup>4</sup>,  
6           Marc Biran<sup>2</sup>, Sabine Bachmaier<sup>3</sup>, H el ene Baudouin<sup>1,2</sup>, Christine Clayton<sup>5</sup>, Michael Boshart<sup>3</sup> and  
7                                   Fr ed eric Bringaud<sup>1,2,\*</sup>

8  
9  
10           <sup>1</sup> Univ. Bordeaux, CNRS, Microbiologie Fondamentale et Pathog enicit e (MFP), UMR 5234, F-33000  
11                                   Bordeaux, France

12           <sup>2</sup> Univ. Bordeaux, CNRS, Centre de R esonance Magn etique des Syst emes Biologiques (CRMSB),  
13                                   UMR 5536, F-33000 Bordeaux, France

14           <sup>3</sup> Fakult at f ur Biologie, Genetik, Ludwig-Maximilians-Universit at M unchen, Gro haderner Strasse 2-  
15                                   4, D-82152 Martinsried, Germany

16           <sup>4</sup> Univ. Bordeaux, Plateforme Prot eome, F-33000, Bordeaux, France

17           <sup>5</sup> Zentrum f ur Molekulare Biologie der Universit at Heidelberg (ZBMH), Universit at Heidelberg, Im  
18                                   Neuenheimer Feld 282, 69120 Heidelberg, Germany

19  
20                                   \*Corresponding author: [frederic.bringaud@u-bordeaux.fr](mailto:frederic.bringaud@u-bordeaux.fr)

21                                   #Contribution of these two co-authors is equivalent

22  
23           **Running title:** Selective advantage of gene rearrangement in the *FRD* locus

24  
25           **Keywords:** *Trypanosoma*; genomic rearrangement; homologous recombination; NADH-dependent  
26           fumarate reductase (FRD); phosphoenolpyruvate carboxykinase (PEPCK); covalent flavinylation;  
27           Cytb5R domain; reactive oxygen species; positive selection; parasite differentiation  
28

29 **Abstract**

30 The genome of trypanosomatids is rearranged at the level of repeated sequences, where serve as  
31 platforms for amplification or deletion of genomic segments. We report here that the *PEPCK* gene  
32 knockout ( $\Delta pepck$ ) leads to the selection of such a deletion event between the *FRDg* and *FRDm2*  
33 genes to produce a chimeric *FRDg-m2* gene in the  $\Delta pepck^*$  cell line. FRDg is expressed in  
34 peroxisome-like organelles, named glycosomes, expression of FRDm2 has not been detected to date,  
35 and FRDg-m2 is a non-functional cytosolic FRD. Re-expression of FRDg significantly impaired  
36 growth of the  $\Delta pepck^*$  cells, while inhibition of *FRDg-m2* expression had no effect, which indicated  
37 that this recombination event has been selected in the  $\Delta pepck^*$  cells to eliminate FRDg. FRD activity  
38 was not involved in the FRDg-mediated negative effect, while its auto-flavinylation motif is required  
39 to impair growth. Considering that (i) FRDs are known to generate reactive oxygen species (ROS) by  
40 transferring electrons from their flavin moiety(ies) to oxygen, (ii) intracellular ROS production is  
41 essential for the differentiation of procyclic to epimastigote forms of the parasite and (iii) the fumarate  
42 reductase activity is not essential for the parasite, we propose that the main role of FRD is to produce  
43 part of the ROS necessary to complete the parasitic cycle in the tsetse fly. In this context, the negative  
44 effect of FRDg expression in the PEPCK null background is interpreted as an increased production of  
45 ROS from oxygen since fumarate, the natural electron acceptor of FRDg, is no longer produced in  
46 glycosomes.

47

## 48 **Introduction**

49 Trypanosomatids, including the human infective *Leishmania* and *Trypanosoma* species, present  
50 several biological singularities in comparison with classical eukaryotic model organisms. For instance,  
51 genes are transcribed constitutively as part of long polycistronic units where the precursor mRNA  
52 molecules are matured by coupled trans-splicing and polyadenylation (1). As a consequence, gene  
53 regulation occurs mostly at the post-transcriptional, translational and post-translational levels with no  
54 control at the level of transcription initiation. Changes in gene copy number can also modulate gene  
55 expression and are therefore seen when selective pressure is applied. They usually arise from  
56 homologous recombination events between repeated sequences and are particularly common in  
57 *Leishmania* spp. (2). In *Leishmania*, small repetitive sequences are widespread throughout the genome  
58 and recombination events appear stochastically with a frequency in the order of  $10^{-6}/10^{-7}$  per cell  
59 generation. They result either in the production of extrachromosomal DNA sequences or in the  
60 deletion of the DNA fragment located between the two recombinogenic repeats. Under selection  
61 pressure, such as exposition to drugs, a subpopulation with an advantageous amplicon conferring drug  
62 resistance can emerge (3–9). The genome of *T. brucei* also contains a large number of sequence  
63 repeats (773) potentially leading to 1848 genetic recombination events, some of them already  
64 experimentally validated (2). So far, no DNA amplification (except for changes in ploidy and in gene  
65 copy number) has been observed upon specific selection, suggesting that deletions are more common  
66 (10–12). We report here the selection of such a stochastic deletion in the genome of *T. brucei* mutants,  
67 which is driven by metabolic constraints.

68 PCF trypanosomes have an elaborate energy metabolism based on glucose or proline, depending on  
69 carbon source availability (13). In the glucose-free environment of its insect host (tsetse fly), the  
70 parasite depends on proline for its metabolism (14, 15) and needs to produce hexose phosphates  
71 through gluconeogenesis from proline-derived phosphoenolpyruvate (PEP) to feed essential pathways  
72 (16). Two phosphoenolpyruvate-producing enzymes, PEP carboxykinase (PEPCK, EC: 4.1.1.32,  
73 Tb927.2.4210) and pyruvate phosphate dikinase (PPDK, EC 2.7.9.1, Tb927.11.3120) have a redundant  
74 function for the essential gluconeogenesis from proline (17). In glucose-rich conditions, PPDK and  
75 PEPCK work in the opposite direction to produce pyruvate and PEP, respectively, in addition to ATP.  
76 This pathway is also essential to maintain the glycosomal redox balance (18). Glycosomes are  
77 specialized peroxisomes, which harbour the 6 or 7 first glycolytic steps (19). Because of the  
78 impermeability of the glycosomal membrane to bulky metabolites, such as cofactors and nucleotides,  
79 ATP molecules consumed by the first glycolytic steps (steps 1 and 2 in Fig S1) need to be regenerated  
80 in the glycosomes by PPDK and PEPCK (step 14 and 15) (18). Similarly,  $\text{NAD}^+$  molecules consumed  
81 in the glycosomes during glycolysis (step 6), have to be regenerated within the organelle by the  
82 succinic fermentation pathway composed of PEPCK, malate dehydrogenase (EC: 1.1.1.37,  
83 Tb927.10.15410, step 16), fumarase (EC: 4.2.1.2, Tb927.10.15410, step 17) and fumarate reductase  
84 (FRDg, EC: 1.3.1.6, Tb927.5.930, step 18) (20).

85 The *T. brucei* genome contains three *FRD* genes. Two are tandemly arranged in chromosome 5: they  
86 encode the glycosomal isoform (FRDg) and a potential FRD isoform for which expression has not  
87 been detected so far in trypanosomes (FRDm2, Tb927.5.940). The third gene, located on chromosome  
88 10, codes for the mitochondrial isoform (FRDm1, Tb927.10.3650, step 21) (21, 22) (Fig 1B). FRDg is  
89 a 120 kDa protein composed of three domains, a N-terminal ApbE (Alternative pyrimidine  
90 biosynthesis protein)-like flavin transferase domain (pfam: PF02424, a central FRD domain  
91 (superfamily: SSF56425) and a C-terminal cytochrome b5 reductase (Cytb5R) domain (superfamily:  
92 SSF63380) (21). In addition FRDg has a conserved flavinylation motif at its extreme N-terminus,  
93 shown to be required for FRD activity in the related organism *Leptomonas pyrrocoris* (23). We  
94 report here that two independent PEPCK null mutant cell lines express a chimeric non-functional  
95 FRDg-m2 isoform resulting from homologous recombination within the *FRDg/FRDm2* locus. The  
96 selective advantage provided by the loss of the *FRDg* gene in the context of the PEPCK null  
97 background depends on the glycosomal localization of FRDg and the presence of the N-terminal  
98 putative flavinylation site. We propose that the absence of metabolic flux through the glycosomal  
99 succinic fermentation pathway in PEPCK null mutants made the FAD/FMN cofactors of FRDg  
100 available to oxygen for production of reactive oxygen species (ROS) in the organelles.

101

## 102 **Results**

103 *Expression of a chimeric FRD isoform in the  $\Delta ppdk/\Delta pepck^{RNAi}$  GPDH mutant cell line.* In order to  
104 study possible changes in gene expression of mutants missing key enzymes involved in the  
105 maintenance of the glycosomal redox and ATP/ADP balances, we have compared the total proteomes  
106 of the parental,  $\Delta ppdk$  (24),  $\Delta pepck$  (20),  $\Delta ppdk/\Delta pepck$  (18) and  $\Delta ppdk/\Delta pepck^{RNAi}$  GPDH.i ("i"  
107 stands for tetracycline-induced) cell lines, by label-free quantitative mass spectrometry. The  
108 effectiveness of this approach was confirmed by the 19.7- to 41.1-fold reduction observed for the  
109 PPDK and/or PEPCK signals in the four mutant cell lines analyzed, compared to the parental cell line  
110 (see Fig 1A). Similarly, the GPDH signal was strongly reduced (15.2-fold) in the  
111  $\Delta ppdk/\Delta pepck^{RNAi}$  GPDH.i mutant. This analysis also showed that expression of FRDg and FRDm2  
112 were 6.5-fold decreased and 10-fold increased, respectively, in the  $\Delta ppdk/\Delta pepck^{RNAi}$  GPDH.i cell  
113 line, while expression of FRDm1 was not affected (Fig 1A). In contrast, expression of the three FRD  
114 isoforms remained unaffected in the three other mutant cell lines (PXD020185 dataset on the  
115 ProteomeXchange Consortium). This FRD expression pattern was confirmed by Western blotting  
116 using immune sera specific to FRDg ( $\alpha$ FRDg) and FRDm2 ( $\alpha$ FRDm2), in addition to the  $\alpha$ FRD  
117 immune serum produced against the conserved FRDg central domain, which is 100% and 71%  
118 identical with FRDm2 and FRDm1, respectively (Fig 1B-C). The  $\alpha$ FRD antibodies recognized two  
119 proteins in both the parental and  $\Delta ppdk/\Delta pepck^{RNAi}$  GPDH.i cell lines, including the ~130 kDa FRDm1  
120 isoform (Fig 1D-E). As previously reported, the second isoform expressed in the parental cell line  
121 (~120 kDa) was recognized by the  $\alpha$ FRDg, while no signal corresponding to FRDm2 was detected

122 using  $\alpha$ FRDm2 (24). In contrast, the ~115 kDa protein expressed in the  $\Delta pdk/\Delta pepck^{RNAi}$  GPDH.i cell  
123 line was recognized by  $\alpha$ FRDm2, but not  $\alpha$ FRDg. This suggests that the mutant cell line switched  
124 from FRDg to FRDm2 expression, although the apparent size of the detected FRDm2 isoform was  
125 higher than the theoretical one (~115 *versus* 94.8 kDa). Coomassie staining, Western blotting (Fig 1E)  
126 and proteomic analyses (Fig 1A) of purified glycosomal fractions confirmed the glycosomal  
127 localization of FRDg expressed in the parental cell line. In contrast, none of the FRD isoforms were  
128 detectable by Western blot in the glycosomal fractions of the mutant cell line, which is consistent with  
129 the proteomic analyses.

130 To determine whether the mutually exclusive expression of FRDg and FRDm2 was related to genomic  
131 rearrangement inside the *FRDg/FRDm2* locus, a Southern blot analysis was conducted using as probe  
132 the conserved FRDg/FRDm2 central domain, which hybridizes with the *FRDm1* gene ("1" in Fig 2A)  
133 but gives a much stronger signal for the *FRDg* and *FRDm2* genes ("g" and "2" in Fig 2A). The  
134 restriction pattern obtained with the NcoI-, PvuII-, NdeI- and XhoI-digested parental genomic DNA  
135 (Fig 2A) was consistent with the restriction map of the *FRDm1* (Fig 2B) and *FRDg/FRDm2* (Fig 2C)  
136 loci deduced from the *T. brucei* TriTrypDB database (strain 927). Although the *FRDm1* locus was  
137 identical in the  $\Delta pdk/\Delta pepck^{RNAi}$  GPDH genome, the pattern observed for the *FRDg/FRDm2* locus  
138 differed markedly (Fig 2A). For instance, the 6.4 kb PvuII-fragment containing the two FRD genes in  
139 the parental genome was converted into a 2.3 kb PvuII-fragment in the mutant genome, suggesting  
140 that 4.1 kb had been deleted from the *FRDg/FRDm2* locus. Analysis of the three other restriction  
141 profiles led to the same conclusion. The size of the deleted DNA fragment (4.1 kb) was consistent  
142 with the size of the theoretical DNA fragment (4074 bp) resulting from homologous recombination  
143 between the central 1450 bp FRD domains, which are 100% identical in the *FRDg* and *FRDm2* genes.  
144 In conclusion, these data showed that a recombination event occurred between the *FRDg* and *FRDm2*  
145 genes in the  $\Delta pdk/\Delta pepck^{RNAi}$  GPDH mutant to generate a *FRDg-m2* chimeric gene coding for a FRD  
146 chimeric protein slightly smaller than FRDg (theoretical molecular weights: 120.6 *versus* 123.5 kDa,  
147 respectively). This DNA rearrangement event was present on both alleles of the locus, since the wild-  
148 type FRDg and FRDm2 amplified DNA fragments (Fig. 2C) and the endogenous FRDg protein (Fig.  
149 1D) were not detectable in the mutant cell line.

150

151 *The homologous recombination event occurs in wild type cells.* To further study this DNA  
152 rearrangement event, we used PCR with primer pairs designed for amplification of the central FRD  
153 domain of the *FRDg* (g5 and g3 primers), *FRDm2* (m5 and m3 primers) and *FRDg-m2* (g5 and m3  
154 primers) genes (see Fig 3A). As expected, the FRDg- and FRDm2-specific DNA fragments were  
155 amplified from the parental EATRO1125 cell line but not from the  $\Delta pdk/\Delta pepck^{RNAi}$  GPDH genomic  
156 DNA (Fig 3B-C), confirming the loss of the wild-type *FRDg/FRDm2* locus in the mutant cell  
157 population. Also in agreement with the Southern blot data, the FRDg-m2 specific fragment was  
158 amplified from the mutant genomic DNA. Interestingly, however, the FRDg-m2 specific fragment was

159 also very weakly PCR-amplified from the parental EATRO1125 cell line, which suggests that the  
160 recombination event stochastically occurred in the wild-type cells (Fig 3B-C). Moreover, a 1.5kb PCR  
161 product was obtained using parental DNA and the g3 and m5 primers; we suggest that the template  
162 was a circularized version of the deleted fragment (Fig 3A-C). No corresponding PCR product was  
163 detected in the mutant cell line, suggesting that the circularized deleted DNA fragment was not  
164 replicated and thus diluted during cell division to become undetectable. The same PCR analysis  
165 conducted on genomic DNA samples showed that the rearrangement event occurred in other strains of  
166 *Trypanosoma brucei* (*T. equiperdum*, *T. b. brucei* and *T. b. rhodesiense*) (Fig 3B).

167 We took advantage of the  $\Delta pdk/\Delta pepck^{RNAi}$ GPDH cell line being homozygous for the *FRDg-m2*  
168 recombinant locus to calculate the allele frequency of *FRDg-m2* in the EATRO1125 parental cell line.  
169 We compared the *FRDg-m2* copy number in the two lines by semi-quantitative PCR using different  
170 amounts of genomic DNA and the g5-m3 primer pair. Primers specific for a control gene (fructose-  
171 1,6-bisphosphatase, Tb927.9.8720) were used for normalisation (Fig 4A). The results showed that the  
172 *FRDg-m2* gene copy number is 3,700-times higher in the  $\Delta pdk/\Delta pepck^{RNAi}$ GPDH homogeneous cell  
173 line relative to the heterogeneous parental population (Fig 4B), indicating that at the time of analysis  
174 one in 1850 cells in the parental population had a hemizygous recombined allele.

175 Altogether, this analysis suggested that the generation of the *FRDg-m2* chimeric gene occurs at low  
176 frequency by homologous recombination in the *T. brucei* genome, but was specifically selected in the  
177  $\Delta pdk/\Delta pepck^{RNAi}$ GPDH cell line.

178  
179 *Selection of the FRDg-m2 recombinant locus also occurred in the  $\Delta pepck$  mutant cell line.* Analysis of  
180 the  $\Delta pepck$  mutant obtained and frozen in 2008 (20), then thawed in 2013 and maintained for weeks in  
181 culture (see Fig 3E, here named  $\Delta pepck^*$ ), yielded more information about selection of the  
182 homologous recombination event in the *FRDg/FRDm2* locus. It is noteworthy that this  
183  $\Delta pdk/\Delta pepck^{RNAi}$ GPDH cell line was not derived from the  $\Delta pepck$  cell line (see Fig 3E). Indeed, the  
184  $\Delta pepck$  and the parental cells showed the same PCR profile, while the  $\Delta pepck^*$  cells maintained for a  
185 long-term in *in vitro* culture showed a pattern similar to the  $\Delta pdk/\Delta pepck^{RNAi}$ GPDH cell line.  
186 Therefore, selection of the recombinant allele occurred independently in a second mutant cell line (Fig  
187 3C). However, the selection process was probably less stringent or more recent in the *PEPCK* null  
188 background compared to the  $\Delta pdk/\Delta pepck^{RNAi}$ GPDH background, as illustrated by the presence of  
189 the wild-type locus in the  $\Delta pepck^*$  population (g5-g3 and m5-m3 primer pairs in Fig 3C), even after  
190 months of growth. As expected from the PCR analysis, the *FRDg-m2* chimeric isoform was expressed  
191 in the  $\Delta pepck^*$  cell line, but not detectable by Western blotting in the  $\Delta pepck$  cells (Fig 3D). It is  
192 noteworthy that proteomics analysis performed on the  $\Delta pepck$  cell line before long-term cultivation  
193 showed an intermediate profile of FRD isoform expression between the parental and the  
194  $\Delta pdk/\Delta pepck^{RNAi}$ GPDH cell lines (PXD020185 dataset on the ProteomeXchange Consortium). These  
195 data strongly suggest selection for the *FRDg-m2* recombinant locus when *PEPCK* is missing (Fig 3E).

196

197 *Cytosolic localization of the inactive chimeric FRDg-m2 isoform.* The glycosomal localization of  
198 FRDg was confirmed by a digitonin cell fractionation experiment. Western blot analysis of the  
199 supernatant fractions confirmed that as expected, the FRDg isoform was released together with the  
200 PPK and PEPCCK glycosomal markers (Fig 5A). In contrast, the FRDg-m2 chimeric isoform  
201 expressed in the  $\Delta pepck^*$  cell line was released at lower digitonin concentrations (0.03 mg *versus* 0.14  
202 mg of digitonin per mg of protein) together with the enolase cytosolic marker (Fig 5A). The cytosolic  
203 location of the FRDg-m2 chimeric isoform expressed in the  $\Delta pepck^*$  cell line was confirmed by a  
204 Western blot analysis of glycosomal and cytosolic fractions prepared by differential centrifugation  
205 after silicon carbide cell homogenization (Fig 5B).

206 The NADH-dependent FRD (NADH-FRD) activity was determined in the glycosomal and cytosolic  
207 fractions of the original EATRO1125.T7T and the  $\Delta pepck^*$  cell lines. As expected, NADH-FRD  
208 activity was detected in the glycosomal fraction of cells expressing FRDg (EATRO1125.T7T), but not  
209 in the glycosomes of the  $\Delta pepck^*$  cell line (Fig 5B). The low level of NADH-FRD activity detected in  
210 the cytosolic fraction of the EATRO1125.T7T cell line, compared to the glycosomal fraction (2.3%),  
211 was presumably due to the lysis of a few glycosomes during the grinding step. The absence of NADH-  
212 FRD activity in the cytosolic fraction of the  $\Delta pepck^*$  cell line demonstrates that the chimeric FRDg-  
213 m2 isoform is inactive (Fig 5B). These data highlight the role of the Cytb5R domain in the NADH-  
214 FRD activity, since only this domain differs between the active FRDg and inactive FRDg-m2  
215 isoforms.

216

217 *Expression of FRDg affects the  $\Delta pepck^*$  growth rate.* Selection of the *FRDg-m2* recombinant locus in  
218 the  $\Delta pepck^*$  and  $\Delta ppdk/\Delta pepck^{RNAi}$ GPDH cell lines implied that either expression of the FRDg-m2  
219 isoform in the cytosol, or abolition of FRDg expression in the glycosomes, provided a selective  
220 advantage to both mutant cell lines. To determine which of these two hypotheses is correct,  
221 tetracycline-inducible ectopic expression of FRDg and RNAi-mediated down-regulation of FRDg-m2  
222 were performed in the  $\Delta pepck^*$  cell line ( $\Delta pepck^{*/OE}$ FRDg and  $\Delta pepck^{*/RNAi}$ FRDg-m2, respectively)  
223 (Fig 6A). These experiments could not be conducted with the  $\Delta ppdk/\Delta pepck^{RNAi}$ GPDH cell line,  
224 because all five available selectable markers had already been used. The glycosomal localization of  
225 the recombinant FRDg in the  $\Delta pepck^{*/OE}$ FRDg.i line was confirmed by Western blotting and  
226 enzymatic activity assay of glycosomal fractions (Fig 5B). The doubling time of the  
227  $\Delta pepck^{*/RNAi}$ FRDg-m2 cell population was identical in the absence (.ni) or the presence (.i) of  
228 tetracycline, indicating that expression of the FRDg-m2 chimera was well tolerated by the  $\Delta pepck^*$   
229 mutant. In contrast, induction of FRDg expression induced a slightly reduced the growth rate of the  
230  $\Delta pepck^{*/OE}$ FRDg.i cell line (Fig 6B).

231 Selection against FRDg expression was confirmed in a co-culture experiment. EGFP-tagged  $\Delta pepck^*$   
232 cell line ( $\Delta pepck^{*/OE}$ EGFPct, constitutively expressing EGFP) was co-cultured with the  $\Delta pepck^*$

233 (control),  $\Delta pepck^{*/RNAi}$ FRDg-m2 or  $\Delta pepck^{*/OE}$ FRDg cell lines in the presence or the absence of  
234 tetracycline, and the proportion of EGFP-positive cells was determined over time by flow cytometry  
235 (Fig 6C). The percentage of EGFP negative cells between induced and non-induced conditions  
236 gradually decreased when FRDg was expressed in the  $\Delta pepck^{*}$  cell line, while there was no selection  
237 against FRDg-m2 expression (Fig 6D). Calculations revealed that expression of FRDg increased the  
238 doubling time of the  $\Delta pepck^{*}$  cells from 12.5 h to 14.2 h (Fig 6E).

239 Recombinant FRDg was ~4.5-times more expressed in the  $\Delta pepck^{*/OE}$ FRDg.i cell line than the  
240 endogenous FRDg in the parental WT cells (Fig 5B). Interestingly, overexpression of FRDg in the WT  
241 background ( $^{OE}$ FRDg.i) also induced a significant growth defect (Fig 7A). FRDg overexpression is  
242 therefore detrimental in the absence as well as in the presence of PEPCK. This does not, however,  
243 affect our overall conclusions: the native levels of FRDg expression must affect the  $\Delta pepck$  and  
244  $\Delta ppdk/\Delta pepck^{RNAi}$ GPDH cell lines more than the EATRO1125.T7T parental cell line, since the  
245 recombined *FRDg/FRDm2* locus has been positively selected in the mutant cell lines.

246

247 *The glycosomal localization of FRDg is required for the growth retardation.* We next tested whether  
248 the negative effect of FRDg expression in the  $\Delta pepck^{*}$  background was dependent on the glycosomal  
249 localization of the protein. To address this question, the C-terminal peroxisomal targeting signal  
250 (PTS1) composed of the last 3 amino acids, the SKI tripeptide in FRDg, was removed from the  
251 recombinant protein to express a functional FRD in the cytosol of the  $\Delta pepck^{*}$  cell line  
252 ( $\Delta pepck^{*/OE}$ FRDg- $\Delta$ SKI). The cytosolic localization of the FRDg- $\Delta$ SKI was confirmed by Western  
253 blotting of the glycosomal and cytosolic fractions (Fig 7A), and NADH-FRD activity was detected in  
254 the cytosolic fraction of the  $\Delta pepck^{*/OE}$ FRDg- $\Delta$ SKI.i cell line (Fig 5B). Co-culture of the  
255  $\Delta pepck^{*/OE}$ EGFPct cell line with the  $\Delta pepck^{*/OE}$ FRDg- $\Delta$ SKI or  $^{OE}$ FRDg- $\Delta$ SKI mutants in the  
256 presence or the absence of tetracycline, performed as above, revealed only minimal growth retardation  
257 upon FRDg- $\Delta$ SKI expression in the  $\Delta pepck^{*}$  or WT backgrounds (Fig 7B). Thus the glycosomal  
258 expression of FRDg was required to affect growth of the  $\Delta pepck^{*}$  cell line.

259

260 *The glycosomal NADH-FRD activity is not responsible for the growth retardation.* FRDg is composed  
261 of a N-terminal ApbE-like, a central fumarate reductase (FRD) and a C-terminal cytochrome b5  
262 reductase domain (Cytb5R) (Fig 1B). To determine the FRDg domains responsible for the negative  
263 growth effect of the FRDg in the  $\Delta pepck$  background, truncated recombinant FRDg proteins missing  
264 the FRD ( $\Delta$ ctl), ApbE-like ( $\Delta$ Nterm) or ApbE-like/FRD ( $\Delta$ Nterm/ctl) domains were expressed in the  
265  $\Delta pepck^{*}$  cell line ( $\Delta pepck^{*/OE}$ FRDg- $\Delta$ ctl,  $\Delta pepck^{*/OE}$ FRDg- $\Delta$ Nterm and  $\Delta pepck^{*/OE}$ FRDg-  
266  $\Delta$ Nterm/ctl, respectively). All three recombinant FRDg proteins were successfully expressed in the  
267 glycosomes, and as expected none of them showed NADH-FRD activity (Fig 8A). The Cytb5R  
268 domain alone (FRDg- $\Delta$ Nterm/ctl) or in combination with the FRD domain (FRDg- $\Delta$ Nterm) did not  
269 affect growth, but surprisingly, expression of FRDg- $\Delta$ ctl was even more deleterious than full-length



270 FRDg (Fig 8B). Clearly, specific NADH-FRD enzymatic activity was not responsible for growth  
271 retardation (Fig 8B). Overexpression of recombinant <sup>OE</sup>FRDg- $\Delta$ ctl also inhibited growth of the  
272 EATRO1125.T7T parental cell line.

273

274 *Growth retardation depends on flavinylation.* The absence of an altered growth phenotype upon  
275 expression of FRDg- $\Delta$ Nterm suggested a possible role of the ApbE-like domain. Recently,  
276 Serebryakova *et al.* showed that the orthologous FRDg of *Leptomonas pyrrocoris*, a trypanosomatid  
277 related to trypanosomes, contains a covalently attached flavin at serine 9 of the N-terminal  
278 flavinylation motif [D<sub>3</sub>(g/s)x(s/t)(s/g)AS<sub>9</sub>]. They suggested that the ApbE-like domain may catalyze  
279 the transfer of FMN from FAD to serine 9 of FRDg. Replacement of S9 by an asparagine residue  
280 abolished both flavinylation and NADH-fumarate reductase activity of *Leptomonas* FRDg (23). We  
281 therefore addressed the role of flavinylation for FRD activity in trypanosomes and for the growth  
282 phenotype caused by glycosomal expression of FRDg in the  $\Delta$ pepck\* background. The FRDg- $\Delta$ 2-9  
283 mutant protein missing the first nine N-terminal residues (the suggested flavinylation motif),  
284 expressed in the  $\Delta$ pepck\* background ( $\Delta$ pepck\*/<sup>OE</sup>FRDg- $\Delta$ 2-9\_D3 and  $\Delta$ pepck\*/<sup>OE</sup>FRDg- $\Delta$ 2-9\_T cell  
285 lines) did not confer glycosomal FRD activity (Fig 8A) upon tetracycline-induced expression and  
286 caused no growth retardation (Fig 8B).

287 The flavinylation of all endogenous and expressed FRD isoforms and mutants was directly assessed by  
288 in gel detection of flavin fluorescence at 526 nm. Using denaturing gels and boiling of protein  
289 samples, only covalently linked flavin was detected (Fig 8C-D). For the glycosomally expressed FRD  
290 mutant proteins, flavinylation correlates with growth phenotype (Fig 9). This confirmed that covalent  
291 flavinylation is required for FRD activity *in vivo* in trypanosomes (Fig 8A). The essential role of FRD  
292 flavinylation for the altered growth phenotype implicates electron transfer, albeit not to fumarate, in  
293 the deleterious effects.

294

295 *Absence of significant FRDg-catalyzed flux in the  $\Delta$ pepck mutant.* Why does FRDg impair growth of  
296 the  $\Delta$ pepck cell line? FAD containing enzymes, including FRD, are known to transfer electrons very  
297 efficiently to oxygen to generate toxic reactive oxygen species (ROS). We therefore hypothesized that  
298 in the absence of metabolic flux through the glycosomal succinate branch, the decrease of fumarate  
299 allows oxygen to become the main FRDg substrate. To determine the contribution of FRDg to the  
300 production of succinate, we analyzed excreted end products (exometabolome) from the metabolism of  
301 the two main carbon sources used by the parental and mutant cell lines (glucose and proline) using the  
302 <sup>1</sup>H-NMR profiling approach. The advantage of <sup>1</sup>H-NMR spectrometry is the possibility to distinguish  
303 protons bound to <sup>12</sup>C and <sup>13</sup>C carbons, so that end products excreted from two different carbon sources  
304 can be distinguished, provided that one is uniformly <sup>13</sup>C-enriched. To achieve this, we used U-<sup>13</sup>C-  
305 proline (25). The parental trypanosomes incubated in the presence of glucose and proline produced  
306 71% acetate, 18% succinate and 11% alanine, as excreted end products (Table 1). As expected,

307 succinate was no longer produced from glucose in the  $\Delta pepck$  cell line (20), while the amounts of  
308 proline-derived succinate were not affected (see Fig S1). The metabolic patterns of the  $\Delta pepck$  and  
309  $\Delta pepck^*$  cell lines were similar, indicating that succinate excreted from proline in the PEPCK null  
310 background was produced not in the glycosomes, but in the mitochondrion by succinyl-CoA  
311 synthetase as previously proposed (25). Our interpretation of these data is consistent with the  
312 maintenance of the level of succinate production from proline in the  $\Delta pepck^*/^{OE}FRDg.i$  mutant, in  
313 which expression of FRDg is 4.5 times higher than in the EATRO1125.T7T cell line (WT) (Table 1).  
314 As expected, no difference was also observed in the  $\Delta pepck^*/^{RNAi}FRDg-m2.i$  (Table 1). These data  
315 suggest that the observed growth phenotype is probably the consequence of the absence of succinate  
316 production within the glycosomes, which may lead to an increase production of ROS by FRDg.

317

## 318 Discussion

319 Stochastic recombination leading to amplification of chromosomal regions located between  
320 homologous direct or inverted repeated sequences has been observed in *Leishmania major* (2). This  
321 genome-wide phenomenon leads to extrachromosomal circular or linear amplified DNAs, as well as  
322 deletion of DNA fragments. DNA amplification through stochastic recombination has a direct impact  
323 on gene dosage and fosters the selection of adaptive traits in response to environmental pressure, such  
324 as drug exposure, as previously reported on many occasions (26). However, the benefit provided by  
325 deletion of DNA fragments is much less obvious. In contrast to *Leishmania* spp., the involvement of  
326 stochastic recombination in adaptation to environmental pressure has not been reported so far for *T.*  
327 *brucei*, presumably due to a stricter replication system where episomal vector maintenance is the  
328 exception (27). This implies that gene deletions or generation of mosaic genes are the observable  
329 effects of stochastic recombination in *T. brucei* (11, 28, 29).  $\Delta pepck$  cell lines expressing the chimeric  
330 FRDg-m2 instead of FRDg constitute one of the two examples of a stochastic recombination event  
331 providing a selective advantage to *T. brucei* reported to date. The other example has been described in  
332 the tandemly arranged genes encoding aquaglyceroporins (AQP2 and AQP3), which facilitate the  
333 transmembrane transport of water and small nonionic solutes. In *T. brucei*, AQP3 plays a role in the  
334 osmoregulation and transport of glycerol, while AQP2 is also a carrier involved in importing the  
335 trypanocidal melarsoprol and pentamidine drugs by endocytosis (11, 30, 31). In some  
336 melarsoprol/pentamidine resistant cell lines the *AQP2* and *AQP3* genes are replaced by a chimeric  
337 *AQP2/3* gene, which lost the capacity to interact with the drugs (11, 29). Since the *AQP2*  
338 (Tb927.10.14170) and *AQP3* (Tb927.10.14180) genes are 80% identical, with three ~80 bp direct  
339 repeats, and are only separated by 857 bp of non coding sequence, formation of the *AQP2/3* chimeric  
340 gene most probably results from drug selection of stochastic homologous recombination within the  
341 *AQP2/AQP3* locus, as described here for the *FRDg/FRDm2* locus.

342 The gene encoding FRDg is composed of three domains, the central FRD domain (433 aa) flanked by  
343 the C-terminal Cytb5R domain (222 aa) and the N-terminal ApbE-like flavin transferase domain (287

344 aa (21–23). FRDg is responsible for the glycosomal NADH-dependent FRD activity, however the  
345 role of the N- and C-terminal domains is currently unknown. Here, we provide evidence that the  
346 Cytb5R domain is required for the FRD activity, since the FRDg-m2 chimera expressed in the cytosol  
347 of the *Δpepck* cell line is not active. Indeed, the only difference between the endogenous FRDg and  
348 chimeric FRDg-m2 isoforms is the C-terminal domain showing 34% (e-value:  $9 \times 10^{-32}$ ) and 27%  
349 (e-value:  $3 \times 10^{-8}$ ) identity with the *Cryptococcus neoformans* Cytb5R, respectively. Since, the NADH-  
350 cytochrome b5 reductases are known to transfer electrons from NADH to cytochrome b5 (32), one  
351 may consider that the Cytb5R domain is part of the electron transfer channel required for the FRD  
352 activity. Elucidating the 3D structure of FRDg is required to define the mechanism of FRDg activity  
353 and characterize this electron transfer channel.

354 Our data suggest that the FRDm2 isoform has lost FRD activity, since it shares the C-terminal domain  
355 of the inactive FRDg-m2 chimera and more importantly it lacks the N-terminal ApbE-like domain  
356 including the flavinylation motif (see Fig 1C, (22)). The *FRDg/FRDm2* locus is conserved across the  
357 trypanosomatid lineage, with the FRD/Cytb5R composite structure of the FRDm2 isoforms conserved  
358 within the *Trypanosoma* species, while *Crithidia fasciculata* and the *Leishmania* spp. have lost the C-  
359 terminal Cytb5R domain. The conservation of FRDm2 in the *Trypanosoma* and *Leishmania* branches,  
360 which separated 400-600 millions years ago (33) is surprising as expression of the FRDm2 isoform  
361 was neither detectable in the PCF nor in bloodstream forms of *T. brucei* (22) and absence of FRD-  
362 specific activity, leaving a biological function enigmatic. Perhaps FRDm2 has a role in stages that  
363 have yet to be examined in detail, such as the epimastigotes.

364 Selection of the FRDg-m2 chimera in the *Δpepck* and *Δppdk/Δpepck*<sup>RNAi</sup> GPDH cell lines implies that  
365 this stochastic recombination event was beneficial for the PCF trypanosomes in the context of the  
366 PEPCK null background. We demonstrated that this selection is driven by the deleterious effect of  
367 FRDg overexpression in the PEPCK null background, which provided a rational explanation for the  
368 selection of the recombined *Δpepck*\* cells. It is noteworthy that a ~5-fold overexpression of FRDg  
369 also slightly affected growth of the parental EATRO1125.T7T cells, suggesting that the normal FRDg  
370 level is compatible with - and perhaps supports - optimal growth of the wild-type parasite, whereas it  
371 impairs growth of the *Δpepck* mutant. This hypothesis may explain why the recombination event has  
372 been selected in the PEPCK null background but not in the wild-type background.

373 How to explain the growth phenotype due to overexpression of FRDg? Several observations support  
374 the view that FRDg, as already observed for FRD from other organisms, can produce reactive oxygen  
375 species (ROS), known to be toxic at high concentrations. For instance, FRD is a major contributor to  
376 ROS formation in *Bacteroides fragilis* exposed to oxygen (34). ROS are formed by autoxidation when  
377 redox enzymes accidentally transfer electrons to oxygen rather than to their physiological substrates.  
378 This enzymatic promiscuity is well illustrated by the *E. coli* aspartate:fumarate oxidoreductase which  
379 was conventionally named aspartate oxidase since oxygen is used as electron acceptor in aerobic  
380 conditions (35). However, this enzyme can also transfer electrons to fumarate, which is certainly its

381 natural substrate in the anaerobic conditions encountered in the intestine by *E. coli* (36). This  
382 autoxidation activity of FAD-dependent redox enzymes is due to the solvent accessibility of the flavin  
383 moiety, which is situated at the protein surface in order to interact with soluble substrates, as described  
384 for the *E. coli* FRD in the absence of its natural substrate, *i.e.* fumarate (37). The notion that oxygen  
385 and fumarate compete for electrons provided by FAD was also reported for the *T. brucei* FRD since  
386 fumarate inhibited hydrogen peroxide formation with the same affinity as it stimulated NADH-  
387 dependent FRD activity ( $K_i = 16$  versus  $20 \mu\text{M}$ ) (38). Thus, abolition of glycosomal succinate  
388 production in the  $\Delta pepck$  background, which is probably due to a significant reduction of the  
389 glycosomal amounts of fumarate (see Fig S1), might stimulate autoxidation activity of FRDg (Fig 10).  
390 This hypothesis is consistent with the absence of growth phenotype for the  $\Delta pepck^{*}/^{OE}FRDg-\Delta 2-9$  cell  
391 lines, which lost the covalently bound flavin required to transfer electron to the acceptor (Fig 8B).  
392 More importantly, the significant increase of the doubling time caused by overexpression of the  
393 recombinant FRDg- $\Delta$ ctl in  $\Delta pepck^{*}$  backgrounds, as well as in the wild-type cells, is consistent with  
394 the proposed competition between fumarate and oxygen for electrons provided by the covalently  
395 bound flavin in the ApbE domain. Indeed, in the absence of the central FRD domain, oxygen would  
396 become the main electron acceptor, regardless of the amounts of fumarate inside the glycosomes.  
397 The next obvious question to ask is what would be the possible role of ROS production by the  
398 glycosomal fumarate reductase? ROS have historically been viewed as toxic metabolic by-products  
399 and causal agents of many pathologies. This notion is indeed supported by irreversible damages to  
400 cellular components caused by high levels of cellular ROS (39). However, this line of thinking has  
401 gradually shifted towards a more positive view with the growing body of evidence showing that lower  
402 levels of ROS are essential signals dictating biological outcomes, such as proliferation, adaptation and  
403 differentiation (40). Interestingly, Dolezelova *et al.* recently showed that cytosolic ROS trigger the  
404 differentiation of *T. brucei* procyclics into epimastigotes in the *in vitro* differentiation model based on  
405 overexpression of RNA-binding protein 6 (RBP6) (41, 42). Indeed, expression of a cytosolic catalase  
406 abolished differentiation of the parasite into mature epimastigotes upon induction of RBP6 expression,  
407 which was interpreted as the consequence of the degradation of hydrogen peroxide produced by the  
408 respiratory chain. Due to its membrane-permeability and high stability (43), hydrogen peroxide could  
409 be produced in any cell compartment, such as glycosomes, to exert its cytosolic effect. Therefore,  
410 FRDg could participate in the production of ROS used to trigger differentiation. This hypothesis is  
411 particularly relevant under the glucose-depleted conditions encountered in the midgut of the fly, which  
412 resembles the situation faced by the  $\Delta pepck$  mutant grown in rich medium (see Fig S1), *i.e.* no  
413 contribution of FRDg in succinate production. We therefore propose that, in the glucose-depleted  
414 environment of the midgut of the fly, FRDg is mainly used for ROS production to participate in the  
415 differentiation of procyclics into epimastigotes. Our model is strengthened by the previous observation  
416 that the absence of FRDg ( $^{RNAi}FRDg$  cell lines) does not affect growth of the PCF trypanosome in  
417 glucose-rich and glucose-depleted conditions, since the parasite has developed alternative means to

418 maintain the glycosomal redox balance and excrete fumarate instead of succinate from glucose  
419 metabolism (14, 20, 21). This indeed suggests that the main role of FRDg is possibly not to participate  
420 in the glycosomal redox balance.

421

## 422 **Methods**

423 *Trypanosomes, cell cultures and preparation of glycosomal fractions.* The PCF of *T. brucei*  
424 EATRO1125.T7T (TetR-HYG T7RNAPOL-NEO) were cultivated at 27°C in the presence of 5% CO<sub>2</sub>  
425 in SDM79 medium containing 10% (v/v) heat-inactivated fetal calf serum and 3.5 mg ml<sup>-1</sup> hemin (44).  
426 Subcellular fraction enriched in glycosomes was prepared by differential centrifugation of parental and  
427  $\Delta pdk/\Delta pepck^{RNAi}$  GPDH.i PCF trypanosomes as described in (19), after homogenizing the cells with  
428 silicon carbide as grinding material. Briefly,  $5 \times 10^9$  cells were washed once in 50 ml of STE (25 mM  
429 Tris, 1 mM EDTA, 250 mM sucrose pH 7.8). After centrifugation, the pellet was resuspended in 0.5  
430 ml of homogenization buffer STE (STE supplemented with ‘Complete EDTA-Free’ protease-inhibitor  
431 cocktail, Roche Applied Science, Mannheim, Germany) and ground in a pre-chilled mortar with 1.5 gr  
432 of wet-weight silicon carbide per gram of cell pellet. The cells were microscopically checked for at  
433 least 90% disruption. The cell lysate was diluted in 7 ml of homogenization buffer, centrifuged at 1000  
434 g and then at 5000 g for 10 min each, at 4°C. The supernatant was centrifuged at 33,000 g for 10 min  
435 at 4°C to yield the glycosome-enriched pellet, which was resuspended in 2 ml of STE buffer and  
436 loading on a continuous sucrose gradient (1-2 M sucrose in STE). After centrifugation at 39,000 rpm  
437 in a vertical rotor, the band corresponding to glycosomes was collected, five-time diluted in STE and  
438 centrifuged at 33,000 g for 30 min at 4°C to yield the glycosomal pellet, which was resuspended in 0.5  
439 ml of STE.

440

441 *Mutant cell lines.* The single  $\Delta pepck::BSD/\Delta pepck::PAC$  ( $\Delta pepck$ ) and double  $\Delta pdk::TetR-$   
442  $HYG/\Delta pdk::T7RNAPOL-NEO \Delta pepck::BSD/\Delta pepck::PAC$  ( $\Delta pdk/\Delta pepck$ ) null mutant cell lines  
443 have been generated before (14, 18, 20, 24). RNAi-mediated inhibition of gene expression of the  
444 glycosomal glycerol-3-phosphate dehydrogenase gene (*GPDH*, EC 1.1.1.8, Tb927.8.3530) was  
445 performed in the  $\Delta pdk/\Delta pepck$  PCF by expression of stem-loop “sense-antisense” RNA molecules of  
446 the targeted sequences corresponding to a 564 bp fragment (position 223 to 786) of the *GPDH* gene  
447 (45, 46), using the pLew100 expression vector, which contains the phleomycin resistance gene (kindly  
448 provided by E.Wirtz and G.Cross) (47). Similarly, the same approach was used to down-regulate  
449 expression of the chimeric FRDg-m2 isoform in the  $\Delta pepck^*$  cell line, by targeting a 544 bp fragment  
450 (position 1937 to 2480) of the *FRDm2* gene (Tb927.5.940). The resulting pLew100-GPDH-SAS and  
451 pLew100-FRDm2-SAS plasmids containing a sense and antisense version of the targeted gene  
452 fragment, separated by a 58-bp and 50-bp fragment, respectively, under the control of a PARP  
453 promoter linked to a prokaryotic tetracycline operator, were constructed as previously described using  
454 the HindIII, XhoI and BamHI restriction sites (18, 20). To express the FRDg isoform in the  $\Delta pepck$

455 background, the *FRDg* gene (Tb927.5.930) was inserted in the HindIII and BamHI restriction sites of  
456 the pLew100 vector to produce pLew100-FRDg plasmid. The *FRDg-ΔSKI* recombinant gene coding  
457 for a FRDg isoform lacking the three C-terminal residues forming the PTS1 (SKI tripeptide) was  
458 generated by replacing the 233-bp ApaI/BamHI fragment of the pLew100-FRDg plasmid by the same  
459 fragment missing the 9 residues coding for the SKI tripeptide. The *FRDg-Δctl* recombinant gene  
460 coding for a FRDg isoform lacking the central FRD domain was generated by removing the 1361-bp  
461 PvuII/PspOMI fragment of the pLew100-FRDg plasmid, corresponding to position 997 bp and 2358  
462 bp in the *FRDg* gene, followed by recircularization of the resulting plasmid. To produce the *FRDg-*  
463 *ΔNterm* recombinant genes a 2343-bp PCR fragment corresponding to position 1083 bp to 3426 bp of  
464 the *FRDg* gene was inserted into the HindIII and BamHI restriction sites of the pLew100 vector. To  
465 generate the *FRDg-ΔNterm/ctl* and *FRDg-Δ2-9* constructs, the 1504-bp HindIII/XhoI fragment of the  
466 pLew100-FRDg plasmid, encoding the first 498 amino acids of FRDg, was replaced by a 498-bp  
467 HindIII/XhoI fragment and a 1477-bp HindIII/XhoI fragment, respectively.

468 To constitutively express EGFP in the *Δpepck\** cell line, the EGFP sequence was inserted in the  
469 HindIII and BamHI restriction sites of the pLew100 vector, which was modified by removing the two  
470 tetracycline operator sequences. The pLew100-FRDg-m2-SAS, pLew100-FRDg and pLew100-  
471 EGFPct plasmids designed to generate the *Δpepck\*/<sup>RNAi</sup>*FRDg-m2, *Δpepck\*/<sup>OE</sup>*FRDg and  
472 *Δpepck\*/<sup>OE</sup>*EGFPct cell lines were provided by the Genecust company. The pLew100 recombinant  
473 plasmids were linearized with the restriction enzyme NotI and transfected into the *Δppdk/Δpepck*  
474 (pLew100-GPDH-SAS), *Δpepck\** (all the other plasmids) or parental (pLew100-FRDg-ΔSKI) cell  
475 lines.

476 Selection of all these mutant cell lines was performed in SDM79 medium containing hygromycin (25  
477  $\mu\text{g ml}^{-1}$ ), neomycin (10  $\mu\text{g ml}^{-1}$ ), blasticidin (10  $\mu\text{g ml}^{-1}$ ), puromycin (1  $\mu\text{g ml}^{-1}$ ) and/or phleomycin (5  
478  $\mu\text{g ml}^{-1}$ ). Aliquots were frozen in liquid nitrogen to provide stocks of each line that had not been in  
479 long-term culture. Induction of RNAi cell lines was performed by addition of 1  $\mu\text{g ml}^{-1}$  tetracycline.

480  
481 *Competitive growth assay.* The objective of this assay is to determine slight but significant doubling  
482 time difference between a conditional mutant and an EGFP tagged reference cell line, upon co-culture  
483 experiments. This assay is based on the co-culture of a tetracycline-inducible conditional mutant cell  
484 line and a reference cell line constitutively expressing EGFP (*Δpepck\*/<sup>OE</sup>*EGFPct\_F5), which has a  
485 doubling time of  $14.26 \pm 1.06$  h. The SDM79 medium was inoculated with the *Δpepck\*/<sup>OE</sup>*EGFPct\_F5  
486 reference cell line ( $1.4 \times 10^6$  cells  $\text{ml}^{-1}$ ) and a mutant cell line ( $0.6 \times 10^6$  cells  $\text{ml}^{-1}$ ), in the presence or  
487 the absence of 1  $\text{mg ml}^{-1}$  tetracycline, and the proportion of EGFP-positive cells was determined every  
488 day by flow cytometry using a Guava EasyCyte Flow Cytometer (Merck Millipore). The difference of  
489 the percentage of EGFP negative cells between induced and non-induced conditions were plotted as a  
490 function of time of growth, in order to estimate the growth difference between the non-induced and  
491 tetracycline-induced cell line.

492

493 *Western blot analyses.* Total protein extracts ( $3\text{-}5 \times 10^6$  cells) or glycosomal extracts of the parental  
494 (EATRO1125.T7T) or mutant PCF of *T. brucei* were separated by SDS-PAGE (8% or 10%) and  
495 immunoblotted on TransBlot Turbo Midi-size PVDF Membranes (Bio-Rad) (48). Immunodetection  
496 was performed as described (48, 49) using as primary antibodies the rabbit anti-FRD (aFRD, 1:100)  
497 (21), the rabbit anti-FRDg (aFRDg, 1:100) (22), the rabbit anti-FRDm2 (aFRDm2, 1:100, produced by  
498 Proteogenix from the EISKSVFPDASLGV and ELGHNKSNIIVTL peptides), the rabbit anti-PEPCK  
499 (aPEPCK, 1:1000) (20), the rabbit anti-GPDH (aGPDH, 1:1000) (50), the rabbit anti-PPDK (aPPDK,  
500 1:1000) (51), the rabbit anti-enolase (aENO 1:100,000, gift from P. Michels, Edinburgh, UK), the  
501 rabbit anti-GAPDH (aGAPDH 1:10,000, gift from P. Michels, Edinburgh, UK), the rabbit anti-PFK  
502 (aPFK 1:5,000, gift from P. Michels, Edinburgh, UK) and the rabbit antibody against the glycosomal  
503 isocitrate dehydrogenase, anti-IDHg (aIDHg 1:20,000, produced by Pineda (Berlin, Germany) against  
504 recombinantly expressed full-length IDHg). Anti-rabbit IgG conjugated to horseradish peroxidase  
505 (Bio-Rad, 1:5,000 dilution) was used as secondary antibody. Detection was performed using the  
506 Clarity Western ECL Substrate as described by the manufacturer (Bio-Rad). Images were acquired and  
507 analyzed with the ImageQuant LAS 4,000 luminescent image analyzer. For near-infrared fluorescent  
508 Western blotting the mouse anti-PFR-A/C (aPFR, 1:2,000) (52) and the rabbit anti-FRD (aFRD,  
509 1:1,000) (21) were used as primary antibodies, the IR-BLOT 800 anti-mouse IgG (Cyanagen Srl,  
510 1:5,000 dilution) and IRDye 680LT anti-rabbit IgG (LI-COR Bioscience, 1:5,000 dilution) as  
511 secondary antibodies. Image acquisition was performed with the Odyssey CLx Near-Infrared  
512 Fluorescence Imaging System and the dedicated software Image Studio (LI-COR Bioscience).

513

514 *Analysis of FRDg flavinylation.* As described in (53), gels resulting from SDS-PAGE were scanned  
515 with a Typhoon TRIO Variable Mode Imager System (GE Healthcare) at  $\lambda_{ex} = 488$  nm and  $\lambda_{em} =$   
516 526 nm for detection of covalently bound flavin and at  $\lambda_{ex} = 670$  nm and  $\lambda_{em} = 633$  nm for  
517 visualization of the Blue Prestained Protein Standard (NEB).

518

519 *Digitonin permeabilization.* Digitonin permeabilization was performed as described before (18).  
520 Briefly, trypanosomes were washed two times in cold PBS and resuspended at  $6.5 \times 10^8$  cells  $\text{ml}^{-1}$   
521 (corresponding to 3.3 mg of protein per ml) in STE buffer (250 mM sucrose, 25 mM Tris, pH 7.4,  
522 1 mM EDTA) supplemented with 150 mM NaCl and the Complete<sup>™</sup> Mini EDTA-free protease  
523 inhibitor cocktail (Roche Applied Bioscience). Cell aliquots (200  $\mu\text{l}$ ) were incubated with increasing  
524 quantities of digitonin (Sigma) for 4 min at 25°C, before centrifugation at 14,000 g for 2 min to collect  
525 the cellular pellet.

526

527 *Enzymatic activities.* Sonicated (5 sec at 4°C) crude extracts of trypanosomes resuspended in cold  
528 hypotonic buffer (10 mM potassium phosphate, pH 7.8) were tested for enzymatic activities. NADH-

529 dependent FRD, glycerol kinase and malic enzyme activities were measured at 340 nm via oxidation  
530 of NADH or NADPH, according to published procedures (18).

531

532 *Southern blot analysis.* Genomic DNA (10 µg) from the parental (EATRO1125.T7T) and  
533  $\Delta pdk/\Delta pepck^{RNAi}$  GPDH cell lines, extracted as previously described (54), was digested with the  
534 NcoI, PvuI, NdeI or XhoI restriction enzymes, separated by electrophoresis in a 0.8% agarose gel and  
535 transferred onto a nylon membrane (Hybond N<sup>+</sup>, Roche Molecular Biochemicals). The membrane was  
536 hybridized with digoxigenin-labeled DNA probes synthesized with a PCR DIG probe synthesis kit  
537 (Roche Molecular Biochemicals) as recommended by the supplier. The *FRD* probe was generated by  
538 PCR amplification, using the primer pair 5'-GTGTAACGTCGTTGCTCAGTGAGA-3' / 5'-  
539 GCGAAATTAAATGGGCCCGCGACG-3'. Probe-target hybrids were visualized by a  
540 chemiluminescent assay with the DIG luminescent detection kit (Roche Molecular Biochemicals),  
541 according to the manufacturer's instructions. Blots were exposed to ImageQuant LAS4010 (GE  
542 Healthcare Life Sciences) for approximately 20 min.

543

544 *Label-free quantitative proteomics.* Total extracts and glycosome-enriched fractions of trypanosomes  
545 were loaded on a 10% acrylamide SDS-PAGE gel and proteins were visualized by Colloidal Blue  
546 staining. For total extracts, migration was performed classically and each protein lane was cut into 4  
547 equal segments. For the glycosome-enriched fractions, migration was stopped when samples had just  
548 entered the resolving gel and the unresolved region of the gel was cut into only one segment. Finally,  
549 each SDS-PAGE band was cut into 1 mm x 1 mm gel pieces. Protein digestion and nano-liquid  
550 chromatography–tandem mass spectrometry analyses on LTQ Orbitrap XL were performed as  
551 previously described (16). For protein identification, Sequest HT and Mascot 2.4 algorithms through  
552 Proteome Discoverer 1.4 Software (Thermo Fisher Scientific Inc.) were used for protein identification  
553 in batch mode by searching against a *Trypanosoma brucei* protein database (11 119 entries, release  
554 46). This database was downloaded from <http://tritrypdb.org> website. Two missed enzyme cleavages  
555 were allowed. Mass tolerances in MS and MS/MS were set to 10 ppm and 0.6 Da. Oxidation of  
556 methionine, acetylation of lysine and deamidation of asparagine and glutamine were searched as  
557 dynamic modifications. Carbamidomethylation on cysteine was searched as static modification.  
558 Peptide validation was performed using Percolator algorithm (55) and only “high confidence” peptides  
559 were retained corresponding to a 1% False Discovery Rate (FDR) at peptide level. Raw LC-MS/MS  
560 data were imported in Progenesis QI (version 2.0; Nonlinear Dynamics, a Waters Company) for  
561 feature detection, alignment, and quantification. All sample features were aligned according to  
562 retention times by manually inserting up to fifty landmarks followed by automatic alignment to  
563 maximally overlay all the two-dimensional (m/z and retention time) feature maps. Singly charged ions  
564 and ions with higher charge states than six were excluded from analysis. All remaining features were  
565 used to calculate a normalization factor for each sample that corrects for experimental variation.



566 Peptide identifications (with FDR<1%) were imported into Progenesis. Only non-conflicting features  
567 and unique peptides were considered for calculation of quantification at protein level, a fold changes  
568 above 2 The mass spectrometry proteomics data have been deposited to the ProteomeXchange  
569 Consortium via the PRIDE (56) partner repository with the dataset identifier PXD020185.

570

571 *Analysis of excreted end products from the metabolism of glucose and proline by proton NMR.*  $2 \times 10^7$   
572 *T. brucei* PCF were collected by centrifugation at 1,400 g for 10 min, washed once with phosphate-  
573 buffered saline (PBS) and incubated in 1 ml (single point analysis) of PBS supplemented with  $2 \text{ g l}^{-1}$   
574  $\text{NaHCO}_3$  (pH 7.4). Cells were maintained for 6 h at 27°C in incubation buffer containing 4 mM [U-  
575  $^{13}\text{C}$ ]-glucose and 4 mM non-enriched proline. The integrity of the cells during the incubation was  
576 checked by microscopic observation. The supernatant (1 ml) was collected and 50  $\mu\text{l}$  of maleate  
577 solution in  $\text{D}_2\text{O}$  (10 mM) was added as internal reference. H-NMR spectra were performed at 500.19  
578 MHz on a Bruker Avance III 500 HD spectrometer equipped with a 5 mm cryoprobe Prodigy.  
579 Measurements were recorded at 25°. Acquisition conditions were as follows: 90° flip angle, 5,000 Hz  
580 spectral width, 32 K memory size, and 9.3 sec total recycle time. Measurements were performed with  
581 64 scans for a total time close to 10 min 30 sec. Resonances of the obtained spectra were integrated  
582 and metabolites concentrations were calculated using the ERETIC2 NMR quantification Bruker  
583 program.

584

### 585 **Acknowledgements**

586 We thank Paul A. Michels (Edinburgh, Scotland) for providing us with the anti-GAPDH, anti-PFK  
587 and anti-enolase immune sera and Marc Ouellette for critical reading of the manuscript.

588

### 589 **Funding and additional information**

590 This work was supported by the Centre National de la Recherche Scientifique (CNRS), the Université  
591 de Bordeaux, the ParaMet PhD programme of Marie Curie Initial Training Network, the Agence  
592 Nationale de la Recherche (ANR) through GLYCONOV and ADIPOTRYP grants of the "Générique"  
593 call, the Laboratoire d'Excellence (LabEx) ParaFrap ANR-11-LABX-0024. Work in the Munich lab  
594 was supported by a student research fellowship and the BioNa junior career award of the Faculty of  
595 Biology of LMU to R.S. and S.B., respectively.

596

### 597 **References**

- 598 1. Clayton, C. E. (2016) Gene expression in Kinetoplastids. *Curr Opin Microbiol.* **32**, 46–51
- 599 2. Ubada, J. M., Raymond, F., Mukherjee, A., Plourde, M., Gingras, H., Roy, G., Lapointe, A.,  
600 Leprohon, P., Papadopoulou, B., Corbeil, J., and Ouellette, M. (2014) Genome-wide stochastic  
601 adaptive DNA amplification at direct and inverted DNA repeats in the parasite *Leishmania*.  
602 *PLoS Biol.* **12**, e1001868
- 603 3. Garvey, E. P., and Santi, D. V. (1986) Stable amplified DNA in drug-resistant *Leishmania* exists  
604 as extrachromosomal circles. *Science.* **233**, 535–40

- 605 4. Grondin, K., Papadopoulou, B., and Ouellette, M. (1993) Homologous recombination between  
606 direct repeat sequences yields P-glycoprotein containing amplicons in arsenite resistant  
607 *Leishmania*. *Nucleic Acids Res.* **21**, 1895–901
- 608 5. Papadopoulou, B., Roy, G., and Ouellette, M. (1993) Frequent amplification of a short chain  
609 dehydrogenase gene as part of circular and linear amplicons in methotrexate resistant  
610 *Leishmania*. *Nucleic Acids Res.* **21**, 4305–12
- 611 6. Olmo, A., Arrebola, R., Bernier, V., Gonzalez-Pacanowska, D., and Ruiz-Perez, L. M. (1995) Co-  
612 existence of circular and multiple linear amplicons in methotrexate-resistant *Leishmania*. *Nucleic*  
613 *Acids Res.* **23**, 2856–64
- 614 7. Dubessay, P., Ravel, C., Bastien, P., Lignon, M. F., Ullman, B., Pages, M., and Blaineau, C.  
615 (2001) Effect of large targeted deletions on the mitotic stability of an extra chromosome  
616 mediating drug resistance in *Leishmania*. *Nucleic Acids Res.* **29**, 3231–40
- 617 8. Ubeda, J. M., Legare, D., Raymond, F., Ouameur, A. A., Boisvert, S., Rigault, P., Corbeil, J.,  
618 Tremblay, M. J., Olivier, M., Papadopoulou, B., and Ouellette, M. (2008) Modulation of gene  
619 expression in drug resistant *Leishmania* is associated with gene amplification, gene deletion and  
620 chromosome aneuploidy. *Genome Biol.* **9**, R115
- 621 9. Leprohon, P., Legare, D., Raymond, F., Madore, E., Hardiman, G., Corbeil, J., and Ouellette, M.  
622 (2009) Gene expression modulation is associated with gene amplification, supernumerary  
623 chromosomes and chromosome loss in antimony-resistant *Leishmania infantum*. *Nucleic Acids*  
624 *Res.* **37**, 1387–99
- 625 10. Wilson, K., Berens, R. L., Sifri, C. D., and Ullman, B. (1994) Amplification of the inosinate  
626 dehydrogenase gene in *Trypanosoma brucei gambiense* due to an increase in chromosome copy  
627 number. *J Biol Chem.* **269**, 28979–87
- 628 11. Graf, F. E., Ludin, P., Wenzler, T., Kaiser, M., Brun, R., Pyana, P. P., Buscher, P., de Koning, H.  
629 P., Horn, D., and Maser, P. (2013) Aquaporin 2 mutations in *Trypanosoma brucei gambiense*  
630 field isolates correlate with decreased susceptibility to pentamidine and melarsoprol. *PLoS Negl*  
631 *Trop Dis.* **7**, e2475
- 632 12. Mulindwa, J., Leiss, K., Ibberson, D., Kamanyi Marucha, K., Helbig, C., Melo do Nascimento, L.,  
633 Silvester, E., Matthews, K., Matovu, E., Enyaru, J., and Clayton, C. (2018) Transcriptomes of  
634 *Trypanosoma brucei rhodesiense* from sleeping sickness patients, rodents and culture: Effects of  
635 strain, growth conditions and RNA preparation methods. *PLoS Negl. Trop. Dis.* **12**, e0006280
- 636 13. Lamour, N., Riviere, L., Coustou, V., Coombs, G. H., Barrett, M. P., and Bringaud, F. (2005)  
637 Proline metabolism in procyclic *Trypanosoma brucei* is down-regulated in the presence of  
638 glucose. *J Biol Chem.* **280**, 11902–11910
- 639 14. Coustou, V., Biran, M., Breton, M., Guegan, F., Riviere, L., Plazolles, N., Nolan, D., Barrett, M.  
640 P., Franconi, J. M., and Bringaud, F. (2008) Glucose-induced remodeling of intermediary and  
641 energy metabolism in procyclic *Trypanosoma brucei*. *J Biol Chem.* **283**, 16342–54
- 642 15. Mantilla, B. S., Marchese, L., Casas-Sanchez, A., Dyer, N. A., Ejeh, N., Biran, M., Bringaud, F.,  
643 Lehane, M. J., Acosta-Serrano, A., and Silber, A. M. (2017) Proline metabolism is essential for  
644 *Trypanosoma brucei brucei* survival in the tsetse vector. *PLoS Pathog.* **13**, e1006158
- 645 16. Allmann, S., Morand, P., Ebikeme, C., Gales, L., Biran, M., Hubert, J., Brennand, A., Mazet, M.,  
646 Franconi, J. M., Michels, P. A., Portais, J. C., Boshart, M., and Bringaud, F. (2013) Cytosolic  
647 NADPH homeostasis in glucose-starved procyclic *Trypanosoma brucei* relies on malic enzyme  
648 and the pentose phosphate pathway fed by gluconeogenic flux. *J Biol Chem.* **288**, 18494–505
- 649 17. Wagnies, M., Bertiaux, E., Cahoreau, E., Ziebart, N., Cruzols, A., Morand, P., Biran, M.,  
650 Allmann, S., Hubert, J., Villafraz, O., Millerioux, Y., Plazolles, N., Asencio, C., Riviere, L.,  
651 Rotureau, B., Boshart, M., Portais, J. C., and Bringaud, F. (2018) Gluconeogenesis is essential  
652 for trypanosome development in the tsetse fly vector. *PLoS Pathog.* **14**, e1007502
- 653 18. Deramchia, K., Morand, P., Biran, M., Millerioux, Y., Mazet, M., Wagnies, M., Franconi, J. M.,  
654 and Bringaud, F. (2014) Contribution of pyruvate phosphate dikinase in the maintenance of the  
655 glycosomal ATP/ADP balance in the *Trypanosoma brucei* procyclic form. *J Biol Chem.* **289**,  
656 17365–17378
- 657 19. Opperdoes, F. R., Borst, P., and Spits, H. (1977) Particle-bound enzymes in the bloodstream form  
658 of *Trypanosoma brucei*. *Eur J Biochem.* **76**, 21–8

- 659 20. Ebikeme, C., Hubert, J., Biran, M., Gouspillou, G., Morand, P., Plazolles, N., Guegan, F., Diolez,  
660 P., Franconi, J. M., Portais, J. C., and Bringaud, F. (2010) Ablation of succinate production from  
661 glucose metabolism in the procyclic trypanosomes induces metabolic switches to the glycerol 3-  
662 phosphate/dihydroxyacetone phosphate shuttle and to proline metabolism. *J Biol Chem.* **285**,  
663 32312–24
- 664 21. Besteiro, S., Biran, M., Biteau, N., Coustou, V., Baltz, T., Canioni, P., and Bringaud, F. (2002)  
665 Succinate secreted by *Trypanosoma brucei* is produced by a novel and unique glycosomal  
666 enzyme, NADH-dependent fumarate reductase. *J Biol Chem.* **277**, 38001–12
- 667 22. Coustou, V., Besteiro, S., Riviere, L., Biran, M., Biteau, N., Franconi, J. M., Boshart, M., Baltz,  
668 T., and Bringaud, F. (2005) A mitochondrial NADH-dependent fumarate reductase involved in  
669 the production of succinate excreted by procyclic *Trypanosoma brucei*. *J Biol Chem.* **280**,  
670 16559–70
- 671 23. Serebryakova, M. V., Bertsova, Y. V., Sokolov, S. S., Kolesnikov, A. A., Baykov, A. A., and  
672 Bogachev, A. V. (2018) Catalytically important flavin linked through a phosphoester bond in a  
673 eukaryotic fumarate reductase. *Biochimie.* **149**, 34–40
- 674 24. Coustou, V., Besteiro, S., Biran, M., Diolez, P., Bouchaud, V., Voisin, P., Michels, P. A., Canioni,  
675 P., Baltz, T., and Bringaud, F. (2003) ATP generation in the *Trypanosoma brucei* procyclic  
676 form: Cytosolic substrate level phosphorylation is essential, but not oxidative phosphorylation. *J*  
677 *Biol Chem.* **278**, 49625–49635
- 678 25. Bringaud, F., Biran, M., Millerioux, Y., Wargnies, M., Allmann, S., and Mazet, M. (2015)  
679 Combining reverse genetics and NMR-based metabolomics unravels trypanosome-specific  
680 metabolic pathways. *Mol Microbiol.* **96**, 917–926
- 681 26. Ponte-Sucre, A., Gamarro, F., Dujardin, J. C., Barrett, M. P., Lopez-Velez, R., Garcia-Hernandez,  
682 R., Pountain, A. W., Mwenechanya, R., and Papadopoulou, B. (2017) Drug resistance and  
683 treatment failure in leishmaniasis: A 21st century challenge. *PLoS Negl Trop Dis.* **11**, e0006052
- 684 27. Patnaik, P. K., Bellofatto, V., Hartree, D., and Cross, G. A. (1994) An episome of *Trypanosoma*  
685 *brucei* can exist as an extrachromosomal element in a broad range of trypanosomatids but shows  
686 different requirements for stable replication. *Mol Biochem Parasitol.* **66**, 153–6
- 687 28. Kramer, S., Klockner, T., Selmayr, M., and Boshart, M. (2007) Interstrain sequence comparison,  
688 transcript map and clonal genomic rearrangement of a 28 kb locus on chromosome 9 of  
689 *Trypanosoma brucei*. *Mol Biochem Parasitol.* **151**, 129–32
- 690 29. Munday, J. C., Eze, A. A., Baker, N., Glover, L., Clucas, C., Aguinaga Andres, D., Natto, M. J.,  
691 Teka, I. A., McDonald, J., Lee, R. S., Graf, F. E., Ludin, P., Burchmore, R. J., Turner, C. M.,  
692 Tait, A., MacLeod, A., Maser, P., Barrett, M. P., Horn, D., and De Koning, H. P. (2014)  
693 *Trypanosoma brucei* aquaglyceroporin 2 is a high-affinity transporter for pentamidine and  
694 melaminophenyl arsenic drugs and the main genetic determinant of resistance to these drugs. *J*  
695 *Antimicrob Chemother.* **69**, 651–63
- 696 30. Bassarak, B., Uzcategui, N. L., Schonfeld, C., and Duszenko, M. (2011) Functional  
697 characterization of three aquaglyceroporins from *Trypanosoma brucei* in osmoregulation and  
698 glycerol transport. *Cell Physiol Biochem.* **27**, 411–20
- 699 31. Song, J., Baker, N., Rothert, M., Henke, B., Jeacock, L., Horn, D., and Beitz, E. (2016)  
700 Pentamidine Is Not a Permeant but a Nanomolar Inhibitor of the *Trypanosoma brucei*  
701 Aquaglyceroporin-2. *PLoS Pathog.* **12**, e1005436
- 702 32. Elahian, F., Sepehrizadeh, Z., Moghimi, B., and Mirzaei, S. A. (2014) Human cytochrome b5  
703 reductase: structure, function, and potential applications. *Crit Rev Biotechnol.* **34**, 134–43
- 704 33. Stevens, J. R., Noyes, H. A., Schofield, C. J., and Gibson, W. (2001) The molecular evolution of  
705 Trypanosomatidae. *Adv Parasitol.* **48**, 1–56
- 706 34. Meehan, B. M., and Malmay, M. H. (2012) Fumarate reductase is a major contributor to the  
707 generation of reactive oxygen species in the anaerobe *Bacteroides fragilis*. *Microbiology.* **158**,  
708 539–546
- 709 35. Nasu, S., Wicks, F. D., and Gholson, R. K. (1982) L-Aspartate oxidase, a newly discovered  
710 enzyme of *Escherichia coli*, is the B protein of quinolinate synthetase. *J. Biol. Chem.* **257**, 626–  
711 632
- 712 36. Tedeschi, G., Negri, A., Mortarino, M., Ceciliani, F., Simonic, T., Faotto, L., and Ronchi, S.  
713 (1996) L-aspartate oxidase from *Escherichia coli*. II. Interaction with C4 dicarboxylic acids and

- 714 identification of a novel L-aspartate: fumarate oxidoreductase activity. *Eur. J. Biochem.* **239**,  
715 427–433
- 716 37. Messner, K. R., and Imlay, J. A. (2002) Mechanism of superoxide and hydrogen peroxide  
717 formation by fumarate reductase, succinate dehydrogenase, and aspartate oxidase. *J. Biol. Chem.*  
718 **277**, 42563–42571
- 719 38. Turrens, J. F. (1987) Possible role of the NADH-fumarate reductase in superoxide anion and  
720 hydrogen peroxide production in *Trypanosoma brucei*. *Mol Biochem Parasitol.* **25**, 55–60.
- 721 39. Bergamini, C., Gambetti, S., Dondi, A., and Cervellati, C. (2004) Oxygen, Reactive Oxygen  
722 Species and Tissue Damage. *Curr. Pharm. Des.* **10**, 1611–1626
- 723 40. Hamanaka, R. B., and Chandel, N. S. (2010) Mitochondrial reactive oxygen species regulate  
724 cellular signaling and dictate biological outcomes. *Trends Biochem. Sci.* **35**, 505–513
- 725 41. Kolev, N. G., Ramey-Butler, K., Cross, G. A., Ullu, E., and Tschudi, C. (2012) Developmental  
726 progression to infectivity in *Trypanosoma brucei* triggered by an RNA-binding protein. *Science.*  
727 **338**, 1352–3
- 728 42. Dolezelova, E., Kunzova, M., Dejung, M., Levin, M., Panicucci, B., Regnault, C., Janzen, C. J.,  
729 Barrett, M. P., Butter, F., and Zikova, A. (2020) Cell-based and multi-omics profiling reveals  
730 dynamic metabolic repurposing of mitochondria to drive developmental progression of  
731 *Trypanosoma brucei*. *PLoS Biol.* **18**, e3000741
- 732 43. van der Reest, J., Lilla, S., Zheng, L., Zanivan, S., and Gottlieb, E. (2018) Proteome-wide analysis  
733 of cysteine oxidation reveals metabolic sensitivity to redox stress. *Nat. Commun.* **9**, 1581
- 734 44. Brun, R., and Schonberger, M. (1979) Cultivation and in vitro cloning or procyclic culture  
735 forms of *Trypanosoma brucei* in a semi-defined medium. *Acta Trop.* **36**, 289–92
- 736 45. Ngo, H., Tschudi, C., Gull, K., and Ullu, E. (1998) Double-stranded RNA induces mRNA  
737 degradation in *Trypanosoma brucei*. *Proc Natl Acad Sci U A.* **95**, 14687–92
- 738 46. Bringaud, F., Robinson, D. R., Barradeau, S., Biteau, N., Baltz, D., and Baltz, T. (2000)  
739 Characterization and disruption of a new *Trypanosoma brucei* repetitive flagellum protein, using  
740 double-stranded RNA inhibition. *Mol Biochem Parasitol.* **111**, 283–97
- 741 47. Wirtz, E., Leal, S., Ochatt, C., and Cross, G. A. (1999) A tightly regulated inducible expression  
742 system for conditional gene knock-outs and dominant-negative genetics in *Trypanosoma brucei*.  
743 *Mol Biochem Parasitol.* **99**, 89–101
- 744 48. Harlow, E., and Lane, D. (1988) *Antibodies: a laboratory manual*, Cold Spring Harbor Laboratory  
745 Press
- 746 49. Sambrook, J., Fritsch, E. F., and Maniatis, T. (1989) *Molecular cloning: a laboratory manual.*,  
747 2nd Ed., Cold Spring Harbor Laboratory Press, New York
- 748 50. Denise, H., Giroud, C., Barrett, M. P., and Baltz, T. (1999) Affinity chromatography using  
749 trypanocidal arsenical drugs identifies a specific interaction between glycerol-3-phosphate  
750 dehydrogenase from *Trypanosoma brucei* and Cymelarsan. *Eur J Biochem.* **259**, 339–46.
- 751 51. Bringaud, F., Baltz, D., and Baltz, T. (1998) Functional and molecular characterization of a  
752 glycosomal PPI-dependent enzyme in trypanosomatids: pyruvate, phosphate dikinase. *Proc Natl*  
753 *Acad Sci USA.* **95**, 7963–8
- 754 52. Kohl, L., Sherwin, T., and Gull, K. (1999) Assembly of the paraflagellar rod and the flagellum  
755 attachment zone complex during the *Trypanosoma brucei* cell cycle. *J Eukaryot Microbiol.* **46**,  
756 105–9
- 757 53. Chiasson, D., Gimenez-Oya, V., Bircheneder, M., Bachmaier, S., Studtrucker, T., Ryan, J.,  
758 Sollweck, K., Leonhardt, H., Boshart, M., Dietrich, P., and Parniske, M. (2019) A unified multi-  
759 kingdom Golden Gate cloning platform. *Sci Rep.* **9**, 10131
- 760 54. Medina-Acosta, E., and Cross, G. A. (1993) Rapid isolation of DNA from trypanosomatid  
761 protozoa using a simple “mini-prep” procedure. *Mol Biochem Parasitol.* **59**, 327–9
- 762 55. Kall, L., Canterbury, J. D., Weston, J., Noble, W. S., and MacCoss, M. J. (2007) Semi-supervised  
763 learning for peptide identification from shotgun proteomics datasets. *Nat Methods.* **4**, 923–5
- 764 56. Deutsch, E. W., Bandeira, N., Sharma, V., Perez-Riverol, Y., Carver, J. J., Kundu, D. J., Garcia-  
765 Seisdedos, D., Jarnuczak, A. F., Hewapathirana, S., Pullman, B. S., Wertz, J., Sun, Z., Kawano,  
766 S., Okuda, S., Watanabe, Y., Hermjakob, H., MacLean, B., MacCoss, M. J., Zhu, Y., Ishihama,  
767 Y., and Vizcaino, J. A. (2020) The ProteomeXchange consortium in 2020: enabling “big data”  
768 approaches in proteomics. *Nucleic Acids Res.* **48**, D1145–D1152
- 769

770 **Table 1.** Excreted end products of glucose and glycerol metabolism by BSF parental and mutant  
 771 cell lines  
 772  
 773  
 774

|                                   | WT                                                                     | <i>Δpepck</i>   | <i>Δpepck*</i> | <i>Δpepck*/<br/>OEFRDg.ni</i> <sup>a</sup> | <i>Δpepck*/<br/>OEFRDg.i</i> <sup>a</sup> | <i>Δpepck*/<br/>RNAiFRDg-<br/>m2.ni</i> | <i>Δpepck*/<br/>RNAiFRDg-<br/>m2.i</i> |
|-----------------------------------|------------------------------------------------------------------------|-----------------|----------------|--------------------------------------------|-------------------------------------------|-----------------------------------------|----------------------------------------|
|                                   | nmol.h <sup>-1</sup> .10 <sup>8</sup> cells <sup>-1</sup> <sup>b</sup> |                 |                |                                            |                                           |                                         |                                        |
| n <sup>c</sup>                    | 3                                                                      | 3               | 3              | 3                                          | 3                                         | 3                                       | 3                                      |
| Succinate (glucose <sup>d</sup> ) | 277 ±15                                                                | nd <sup>e</sup> | nd             | nd                                         | nd                                        | nd                                      | nd                                     |
| Succinate (proline <sup>d</sup> ) | 132 ±19                                                                | 147 ±21         | 138 ±14        | 94 ±7                                      | 78 ±6                                     | 78 ±4                                   | 72 ±4                                  |
| Acetate (glucose)                 | 1431 ±121                                                              | 385 ±25         | 400 ±39        | 414 ±32                                    | 409 ±10                                   | 402 ±20                                 | 394 ±11                                |
| Acetate (proline)                 | 238 ±12                                                                | 366 ±26         | 395 ±39        | 308 ±16                                    | 330 ±18                                   | 345 ±19                                 | 347 ±15                                |
| Alanine (glucose)                 | 229 ±25                                                                | 374 ±29         | 405 ±41        | 367 ±23                                    | 391 ±13                                   | 409 ±14                                 | 400 ±7                                 |
| Alanine (proline)                 | 31 ±4                                                                  | 142 ±11         | 156 ±20        | 163 ±8                                     | 182 ±15                                   | 140 ±15                                 | 141 ±8                                 |
| <b>Total (glucose)</b>            | <b>1950 ±120</b>                                                       | <b>759 ±54</b>  | <b>806 ±78</b> | <b>781 ±54</b>                             | <b>800 ±12</b>                            | <b>811 ±34</b>                          | <b>794 ±16</b>                         |
| <b>Total (proline)</b>            | <b>401 ±15</b>                                                         | <b>655 ±56</b>  | <b>689 ±71</b> | <b>565 ±29</b>                             | <b>590 ±15</b>                            | <b>563 ±28</b>                          | <b>561 ±20</b>                         |

775

776

777

778

779 <sup>a</sup> .i: RNAi cell line induced during 5 days by addition of tetracycline; .ni: non-induced RNAi  
 780 cell line

781 <sup>b</sup> The amounts of end products excreted from glucose and proline metabolism are expressed  
 782 as nmoles excreted per hour and per 10<sup>8</sup> cells

783 <sup>c</sup> Number of biological replicates

784 <sup>d</sup> Carbon source metabolized into succinate

785 <sup>e</sup> nd: not detectable

786

787

788

789

790 **Figure legends**

791

792 **Figure 1. Altered expression of the FRD isoforms in the  $\Delta ppdk/\Delta pepck^{RNAi}$  GPDH mutant cell**  
793 **line.** Panel A compares the expression of glycosomal glycolytic enzymes and FRD isoforms obtained  
794 by label-free mass spectrometry proteomic analysis (n=3) of total lysates and glycosomal fractions of  
795 the parental (WT) and tetracycline-induced  $\Delta ppdk/\Delta pepck^{RNAi}$  GPDH ( $\Delta/\Delta^{RNAi}$  GPDH.i) cell lines (see  
796 the PXD020185 dataset in the PRIDE partner repository). The ratio between peptide counts in the  
797 parental and mutant cell lines is indicated in the WT/Mut column, with those showing big differences  
798 being highlighted. The organization of FRD genes in the *T. brucei* genome is shown in panel B with  
799 the glycosomal FRDg and the putative mitochondrial FRDm2 isoforms tandemly arranged on  
800 chromosome 5, while the mitochondrial FRDm1 isoform is located on chromosome 10. The white,  
801 black and grey (light and dark) boxes represent the ApbE-like, fumarate reductase and cytochrome b5  
802 reductase domains, respectively. Mitochondrial targeting signals present at the N-terminus extremity  
803 of FRDm1 (experimentally confirmed (22)) and FRDm2 (putative signal corresponding to most of the  
804 hatched box) are indicated by asterisks, and the PTS1 motif at the C-terminal end of FRDg is  
805 highlighted by a hash. The recombinant protein (aFRD) and peptides (aFRDg and aFRDm2) used for  
806 immune sera production are indicated by black bars. Panel C indicates amino acid identity between the  
807 3 domains shared by the FRD isoforms expressed as percentage, with the value into brackets  
808 corresponding to nucleotide identity. Expression of the FRD isoforms in the parental (WT) and  
809  $\Delta/\Delta^{RNAi}$  GPDH.i cell lines is shown in panel D by Western blot, using antibodies specific for FRDg  
810 (aFRDg), FRDm2 (aFRDm2) or the three *T. brucei* FRD isoforms (aFRD). Panel E shows the analysis  
811 of the glycosomal localization of the FRD isoforms performed by Western blot with the indicated  
812 immune sera on total trypanosome lysates (left panel) and purified glycosomes (central panel) of the  
813 parental and  $\Delta ppdk/\Delta pepck^{RNAi}$  GPDH.i cell lines. The glycosomal isocitrate dehydrogenase (IDHg)  
814 antibodies were used as a loading control. The right panel is a Coomassie staining of purified  
815 glycosomes, which highlights the absence of PPK, PEPCK, GPDH and FRDg in the glycosomes of  
816 the mutant cell line.

817

818 **Figure 2. Recombination inside the  $FRDg/FRDm2$  locus in the  $\Delta ppdk/\Delta pepck^{RNAi}$  GPDH cell line.**

819 Panel A shows a Southern blot analysis of the parental (WT) and  $\Delta ppdk/\Delta pepck^{RNAi}$  GPDH mutant  
820 (M) genomic DNA after digestion with the NcoI, PvuII, NdeI or XhoI restriction enzymes and probing  
821 with the  $FRDg/FRDm2$  central domain, homologous to the  $FRDm1$  gene (weak signals present in both  
822 cell lines). Abbreviations used to identify the labelled fragments: 1, FRDm1; 2, FRDm2; g, FRDg; \*,  
823 FRDg-m2. The restriction maps presented in panels B (FRDm1) and the upper part of panel C  
824 ( $FRDg/FRDm2$  locus) are deduced from the genome sequence of the 927 strain available in  
825 TriTrypDB, while the lower part of panel C represents the  $FRDg/FRDm2$  locus after deletion of the  
826 4.1 kb fragment by homologous recombination (dot lines) in the  $\Delta ppdk/\Delta pepck^{RNAi}$  GPDH mutant cell

827 line ( $\Delta/\Delta^{RNAi}$ GPDH). The size of the fragments is indicated in kb and the black bars represent the  
828 DNA fragment used to probe the blot. See Fig 1B legend for the color code of the genes.

829

830 **Figure 3. PCR analysis of the recombination event in the *FRDg/FRDm2* locus.** The PCR strategy  
831 developed to detect a recombination event within the *FRDg/FRDm2* locus is described in panel A.  
832 This schematic representation shows the DNA recombination event leading to the deletion of the  
833 *FRDm2-g* fragment, which can be circularized by ligation, as well as the position of the primers  
834 (arrows) designed to amplify the *FRD* domains of *FRDg* (g5-g3; 1583 bp), *FRDm2* (m5-m3; 1611 bp)  
835 and the chimeric *FRDg-m2* (g5-m3; 1577 bp), as well as the recircularized deleted *FRDm2-g* fragment  
836 (g3-m5; 1608 bp). See Figure 1B legend for the color code of the genes. Panel B shows a PCR  
837 analysis of the EATRO1125.T7T parental and  $\Delta ppdk/\Delta pepck^{RNAi}$ GPDH cell lines, as well as seven  
838 additional African trypanosome strains, using 100 ng of genomic DNA ( $10 \mu\text{g ml}^{-1}$ ). In panels C-D, a  
839 comparative analysis of the parental EATRO1125.T7T,  $\Delta pepck^*$ ,  $\Delta pepck$  and  
840  $\Delta ppdk/\Delta pepck^{RNAi}$ GPDH cell lines is presented, using the PCR approach described in panel A (Panel  
841 C) and the Western blot analysis using antibodies specific for Enolase (aENO), *FRDg* (aFRDg),  
842 *FRDm2* (aFRDm2) or the three *T. brucei* *FRD* isoforms (aFRD) (Panel D). The history of the  
843  $\Delta ppdk/\Delta pepck^{RNAi}$ GPDH and  $\Delta pepck$  cell lines (boxed), which have selected the recombinant  
844 *FRDg/FRDm2* locus, is shown in Panel E. The  $\Delta pepck$  cell line obtained in 2009 contains the parental  
845 *FRDg/FRDm2* locus, which became recombined later after long-term *in vitro* culture ( $\Delta pepck^*$  cell  
846 line, 2014).Figure 4

847

848 **Figure 4. Quantitation of recombined locus frequency.** Panel A shows PCR analyses of the wild  
849 type (WT) and  $\Delta ppdk/\Delta pepck^{RNAi}$ GPDH cell lines using primers designed for DNA amplification of  
850 the chimeric *FRDg-m2* gene (upper panel) or the *FBPase* gene for normalisation (lower panel). The  
851 fraction of recombined loci was determined by calculating the relative difference between the two  
852 linear regressions of *FRDg-m2* PCR signal (gel scan) as a function of the amount of input genomic  
853 DNA (panel B). The value obtained for the *FRDg-m2* PCR signal with  $10 \mu\text{g ml}^{-1}$  of  
854  $\Delta ppdk/\Delta pepck^{RNAi}$ GPDH genomic DNA, highlighted by an asterisk, was excluded from the trend line.

855

856 **Figure 5. The cytosolic *FRDg-m2* chimeric isoform is not enzymatically active.** Panel A shows the  
857 glycosomal and cytosolic localization of *FRDg* and the chimeric *FRDg-m2* isoforms, respectively, by  
858 digitonin titration. The supernatant collected from the EATRO1125.T7T and  $\Delta pepck^*$  cells incubated  
859 with 0-0.29 mg of digitonin per mg of protein was analyzed by Western blot using the anti-*FRDg*,  
860 anti-*FRDm2* as well as immune sera against cytosolic (enolase, ENO), glycosomal (PPDK) and  
861 mitochondrial (threonine dehydrogenase, TDH) markers. Panel B shows the Western blotting and  
862 enzymatic activities determined in the glycosomal and cytosolic fractions of EATRO1125.T7T (1),  
863  $\Delta pepck^*$  (2),  $\Delta pepck^*/^{RNAi}$ *FRDg-m2.i* (3) and  $\Delta pepck^*/^{OE}$ *FRDg.i* (4) cells lines. Expression of *FRDg*

864 and the chimeric FRDg-m2 isoforms was determined by Western blotting using the anti-FRDg and  
865 anti-FRDm2 immune sera (top panel). Immune sera against the glycosomal phosphofructokinase  
866 (PFK) and the cytosol enolase (ENO) were used as loading controls. NADH-FRD activity was  
867 determined on the same fractions used for Western blot analyses. For normalization, the glycerol  
868 kinase (GK) and malic enzyme activities were also determined in the glycosomal and cytosolic  
869 fractions (lower panel).

870

871 **Figure 6. Expression of FRDg is responsible for reduced growth of the  $\Delta pepck^*$  cell line.** In panel  
872 A, expression of the FRD isoforms in the EATRO1125.T7T and  $\Delta pepck^*$  parental cell lines, as well as  
873 the tetracycline-induced (.i) or non-induced (.ni)  $\Delta pepck^*/^{RNAi}$ FRDg-m2 and  $\Delta pepck^*/^{OE}$ FRDg was  
874 monitored by Western blot analysis using immune sera indicated on the left margin. Expression of the  
875 FRD isoform(s) is indicated under the blot. The growth curves of these tetracycline-induced (.i or  
876 +Tet) or non-induced (.ni or -Tet) cell lines are shown in panel B. To confirm the moderate growth  
877 defect observed for the  $\Delta pepck^*$  mutant expressing the recombinant FRDg ( $\Delta pepck^*/^{OE}$ FRDg.i), the  
878  $\Delta pepck^*$ ,  $\Delta pepck^*/^{RNAi}$ FRDg-m2 and  $\Delta pepck^*/^{OE}$ FRDg cell lines were co-cultured with the  $\Delta pepck^*$   
879 cell line constitutively expressing EGFP ( $\Delta pepck^*/^{OE}$ EGFPct), in the presence or the absence of  
880 tetracycline. Flow cytometry analyses were conducted to determine EGFP positive cells  
881 ( $\Delta pepck^*/^{OE}$ EGFPct) and EGFP negative cells ( $\Delta pepck^*$  or double mutant cell lines) all along the  
882 growth curve, as illustrated in panel C. Panel D shows the difference of the percentage of EGFP  
883 negative cells between non-induced and induced conditions, all along the 16-day co-culture (mean of 3  
884 independent experiments). The growth curve of induced and non-induced  $\Delta pepck^*/^{OE}$ FRDg co-  
885 cultured with the EGFP-tagged parental cell line ( $\Delta pepck^*/^{OE}$ EGFPct) was deduced from the same  
886 datasets and plotted in panel E. The numbers indicate the population doubling time in both growth  
887 conditions.

888

889 **Figure 7. The cytosolic expression of FRDg does not affect growth of the  $\Delta pepck^*$  cell line.** Panel  
890 A shows the effect of the expression of full length FRDg and FRDg- $\Delta$ SKI in the WT ( $^{OE}$ FRDg and  
891  $^{OE}$ FRDg- $\Delta$ SKI) or the  $\Delta pepck^*$  background ( $\Delta pepck^*/^{OE}$ FRDg and  $\Delta pepck^*/^{OE}$ FRDg- $\Delta$ SKI) using as  
892 negative and positive controls the  $\Delta pepck^*$  cell line. For this experiment, the mutant cell lines were  
893 co-cultured with the  $\Delta pepck^*$  cell line constitutively expressing EGFP ( $\Delta pepck^*/^{OE}$ EGFPct), in the  
894 presence or the absence of tetracycline, as described in Figure 6C. The difference of the percentage of  
895 EGFP negative cells between non-induced and induced conditions is plotted as a function of time of  
896 growth (mean of 3 independent experiments). The top panel shows a Western blot analysis of these  
897 tetracycline-induced (.i) or non-induced (.ni) cell lines. In panel B, expression of the endogenous  
898 FRDg isoform in the parental EATRO1125.T7T cell line (WT) or the recombinant FRDg- $\Delta$ SKI in the  
899 tetracycline-induced  $\Delta pepck^*/^{OE}$ FRDg- $\Delta$ SKI mutant was monitored in the glycosomal (Gly) and  
900 cytosolic (Cyto) fractions by Western blot analysis using the immune sera indicated on the left margin.



901 The lower panel shows the glycosomal and cytosolic NADH-FRD activities normalized with the GK  
902 and malic enzyme activities, respectively.

903

904 **Figure 8. The flavinylation motif of the FRDg N-terminal domain is required for growth**  
905 **retardation of the  $\Delta pepck^*$  cell line.** Panel A shows Western blot analyses of cytosol-enriched (C)  
906 and glycosome-enriched (G) fractions from  $\Delta pepck^*$  cell lines expressing truncated or mutated  
907 recombinant FRDg. See Figure 5 for the immune sera used. The lower panel shows the glycosomal  
908 and cytosolic NADH-FRD activities normalized with the GK and malic enzyme activities,  
909 respectively. Panel B shows the effect of the expression of FRDg, FRDg- $\Delta$ ctl, FRDg- $\Delta$ Nterm, FRDg-  
910  $\Delta$ Nterm/ctl and FRDg- $\Delta$ 2-9 (clones D3 and T) in the  $\Delta pepck^*$  background and expression of FRDg-  
911  $\Delta$ ctl in the parental EATRO1125.T7T (WT) background, as described in Figures 6 and 7. The Western  
912 blot control of the <sup>OE</sup>FRDg- $\Delta$ ctl cell line is shown in Figure S2. The difference of the percentage of  
913 EGFP negative cells between non-induced and induced conditions is plotted as a function of time of  
914 growth (mean of 3 independent experiments). Panels C and D show the presence of covalent  
915 flavinylation of the FRD isoforms and mutants in the cell lines analyzed (.i, tetracycline-induced; .ni,  
916 non-induced. The top panels show directly detected fluorescence of covalently bound flavin on a  
917 denaturing gel, while the lower panels show Western blot analyses with the anti-FRDg and anti-PFR  
918 (internal loading reference) immune sera. The locations of the endogenous and recombinant FRDg  
919 protein bands are indicated by an asterisk (\*) on the direct fluorescence gel image; the positions of  
920 FRD isoform bands are indicated at the left gel margin, as detailed in C.

921

922 **Figure 9. Correlations between FRD domains, FRD flavinylation, glycosomal localization and**  
923 **effect on growth of the  $\Delta pepck^*$  cell line.** This figure summarizes expression of the endogenous and  
924 mutated FRDg in the  $\Delta pepck^*$  background, their subcellular localization, NADH-dependent FRD  
925 activity, covalent flavinylation and the effect on growth of the  $\Delta pepck^*$  cell line. The white, black and  
926 grey boxes represent the ApbE-like, fumarate reductase and cytochrome *b*<sub>5</sub> reductase domains,  
927 respectively, and the consensus flavinylation motif is indicated in red (the serine residue that is most  
928 likely the covalent attachment site of the flavin moiety is bold and underlined). Difference of  
929 phenotype compared to the  $\Delta pepck^*/^{OE}$ FRDg (FRDg) cell line expressing endogenous FRDg is  
930 indicated in white on a black background. Glyco, glycosome; Cyto, cytosol.

931

932 **Figure 10. These schematic representations illustrate our hypothesis supported by our data and**  
933 **the previously described ability of FRDg to produce ROS (38).** We propose that fumarate and  
934 oxygen compete for electrons provided by FAD in the FRD domain. The covalently bound flavin in  
935 the ApbE domain could also transfer electrons to oxygen. Unknown electron flows within FRDg and  
936 with potential substrates are indicated by dotted lines. The covalently bound flavin in the ApbE

937 domain (FMN) and the FAD prosthetic cofactor in the FRD and Cytb5R domains (FAD) are shown in  
938 red and green, respectively.  
939  
940

941  
942

Figure 1

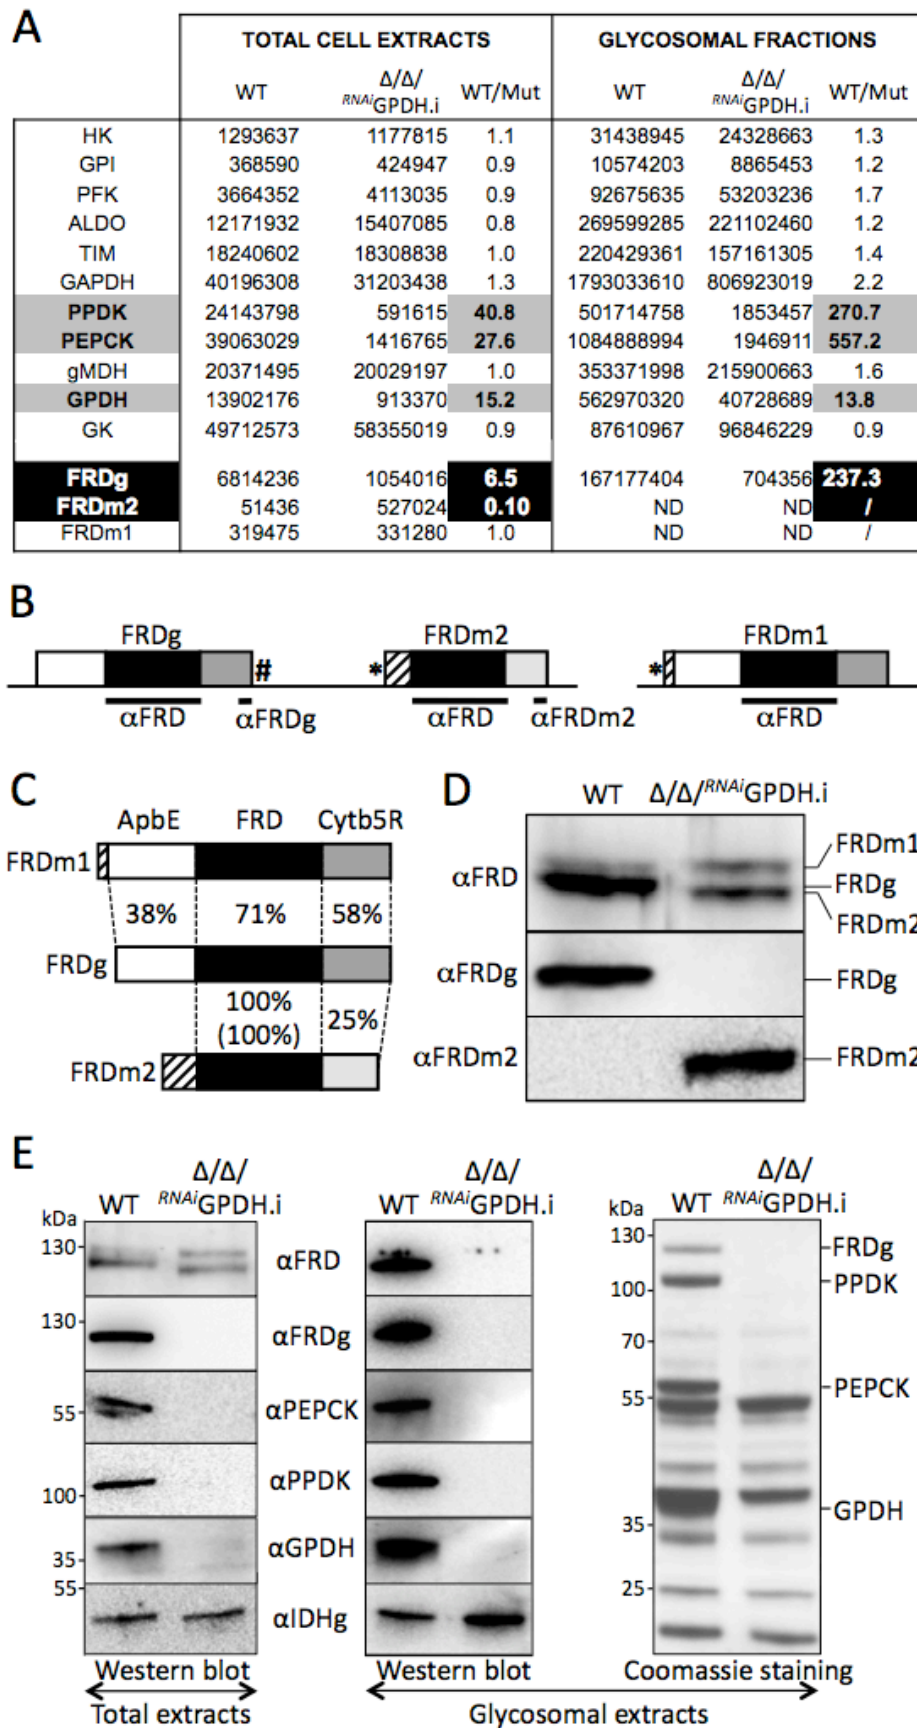

943

944  
945  
946  
947  
948  
949

Figure 2

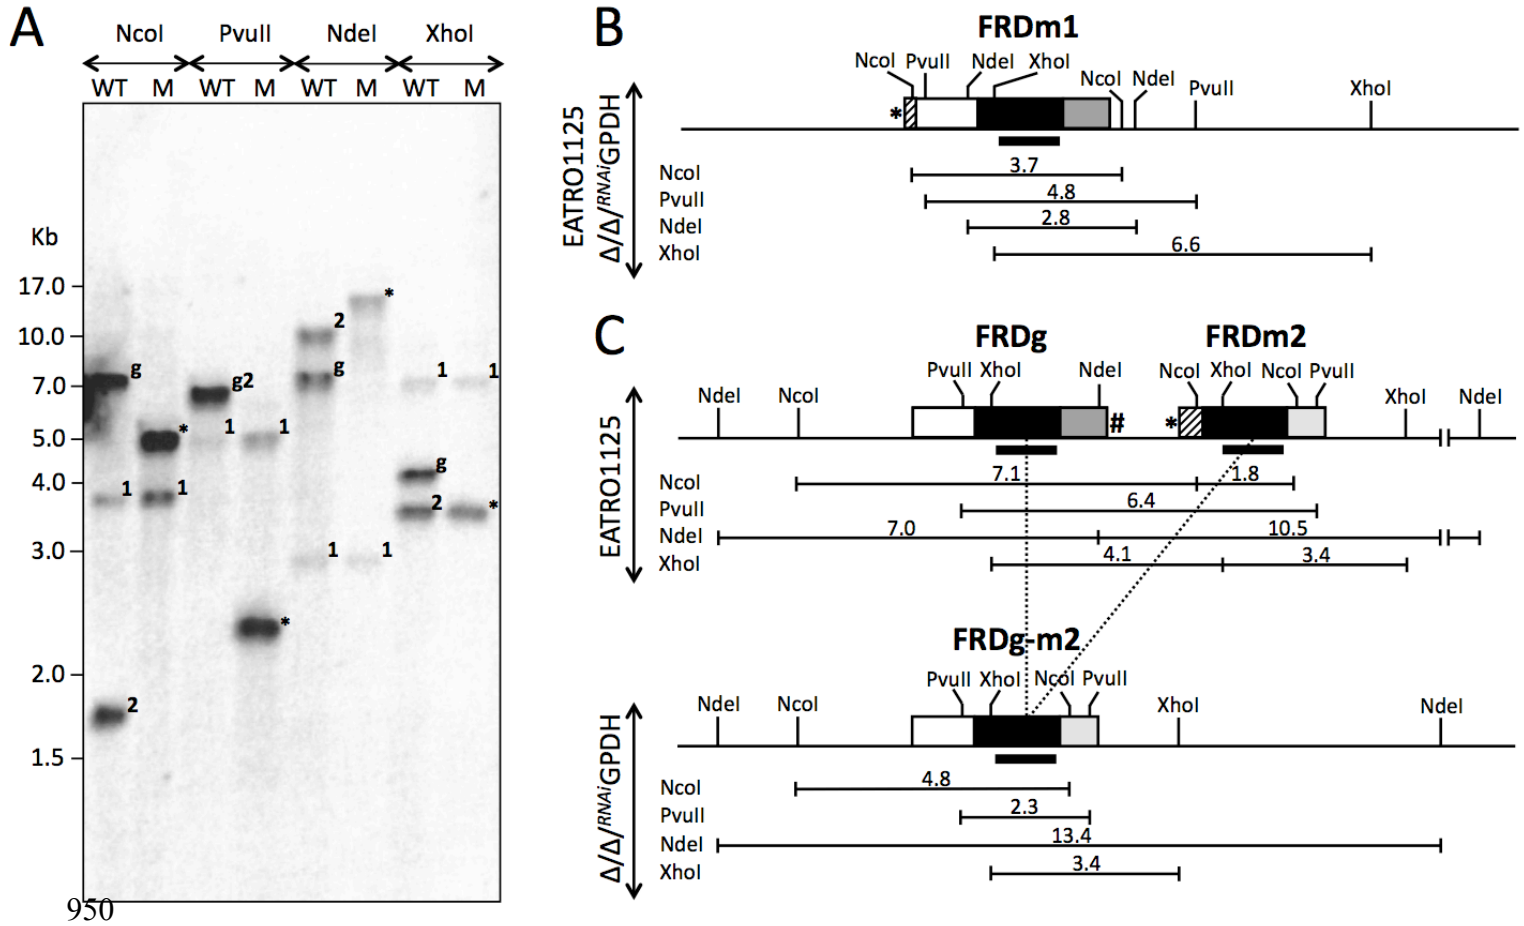

951  
952  
953  
954

Figure 3

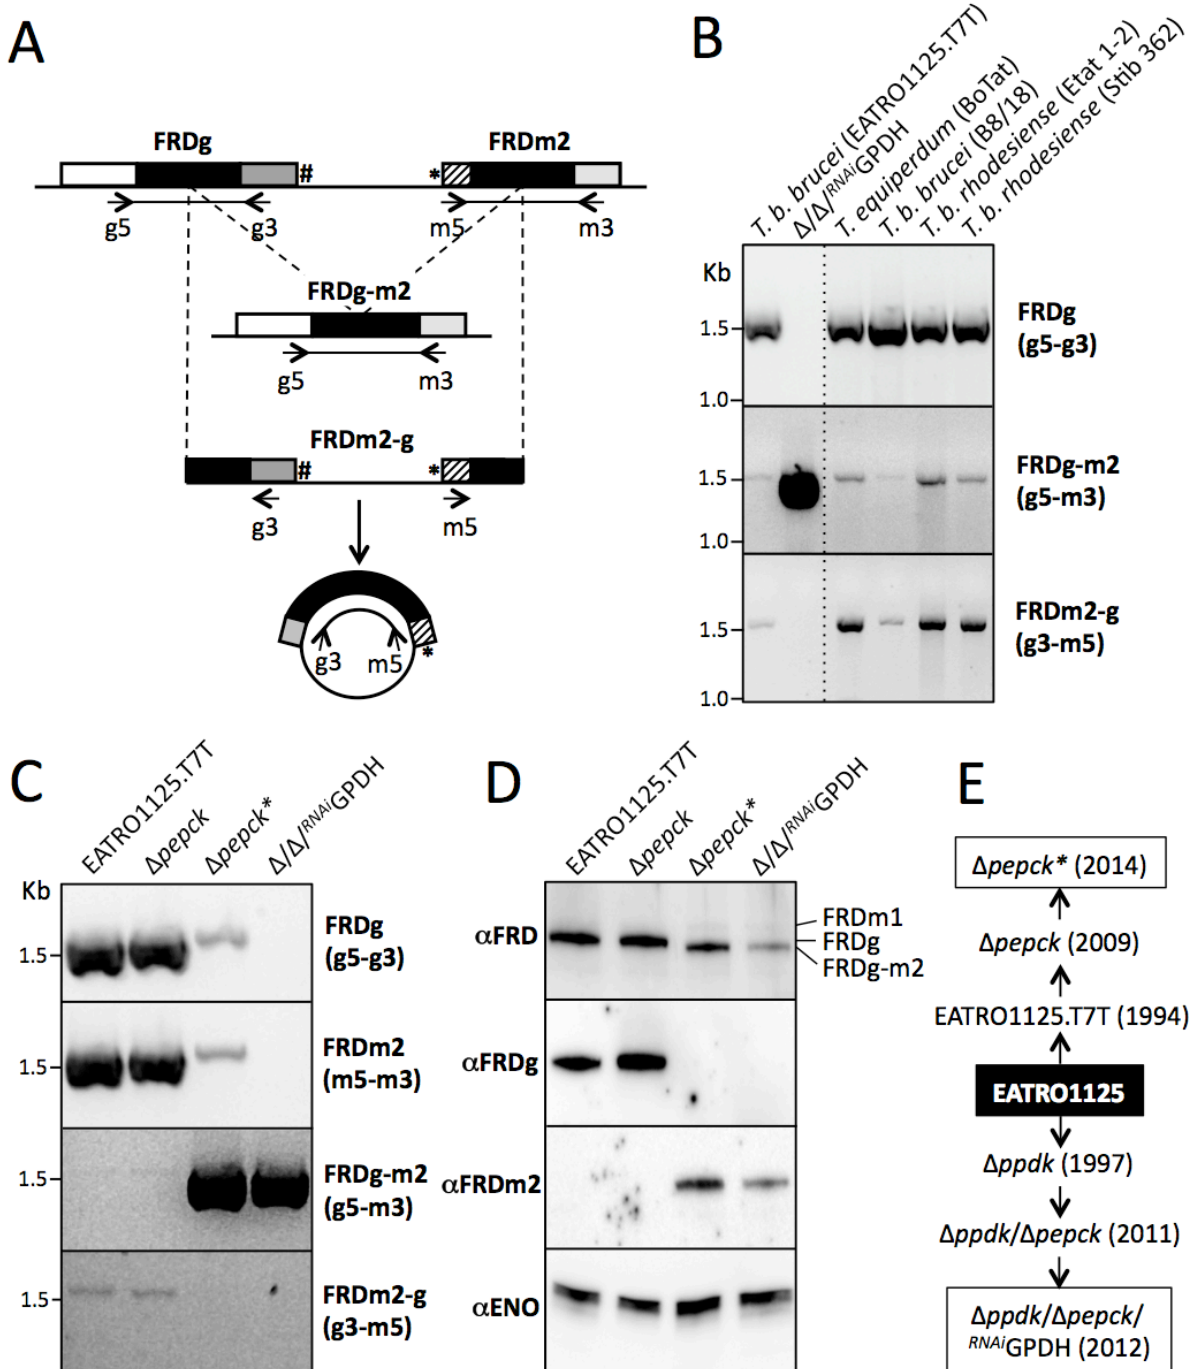

955  
956

957  
958  
959  
960

Figure 4

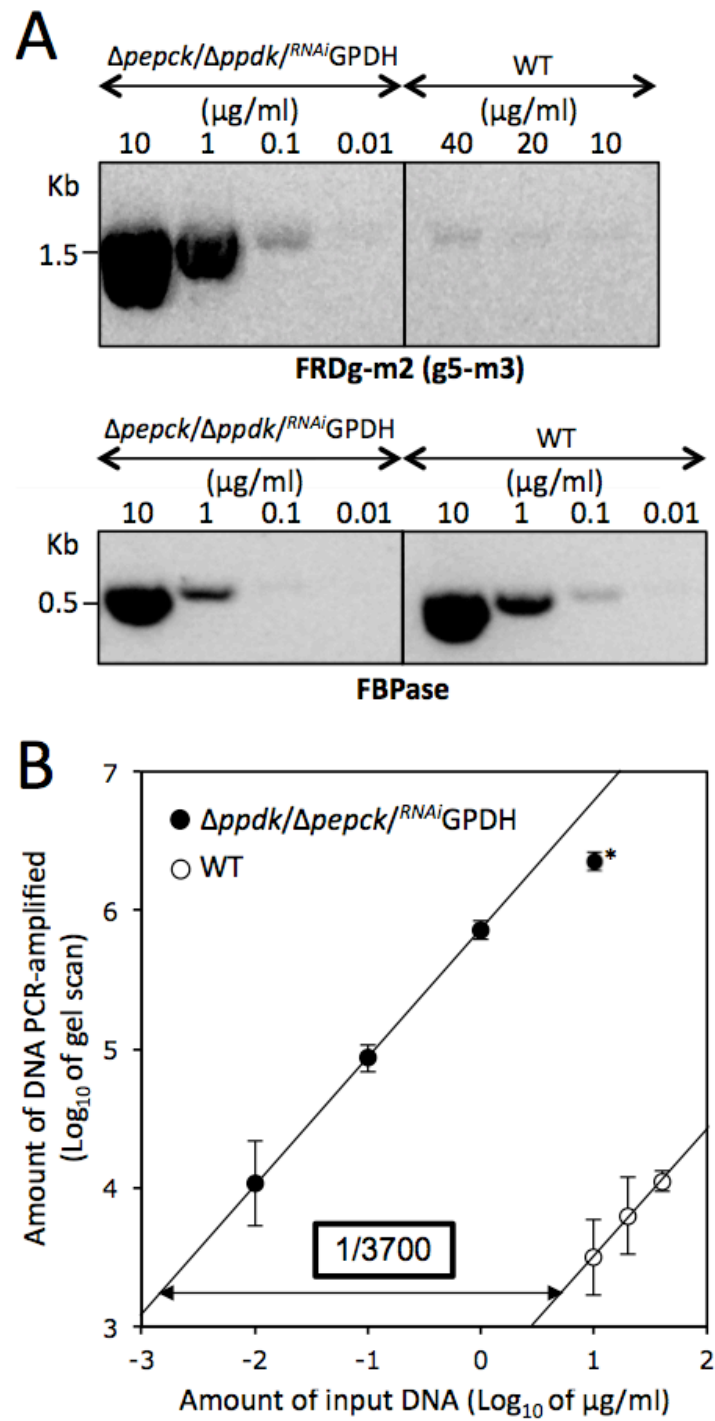

961  
962

963  
964

Figure 5

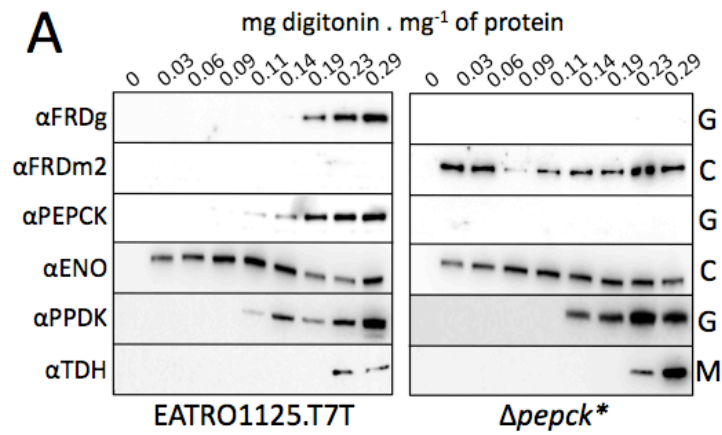

**B**      Glycosomal fractions      Cytosolic fractions

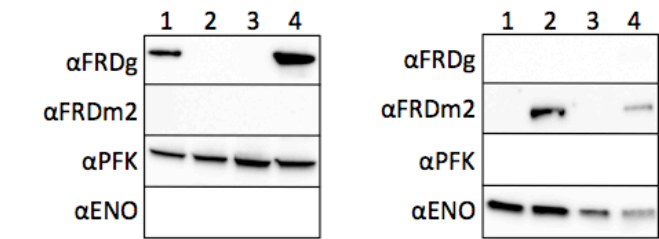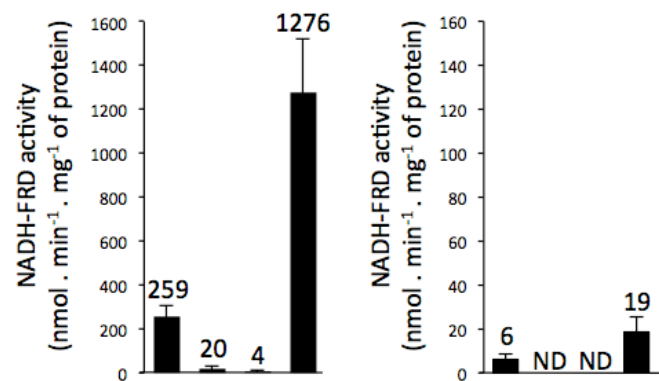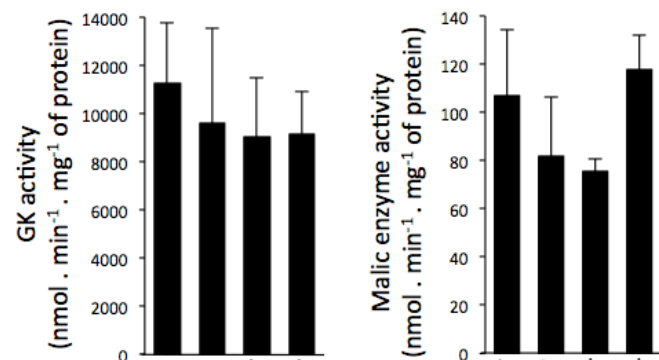

EATRO1125.T7T      *Δpepck\**  
*Δpepck\*/RNAiFRDg-m2.i*      *Δpepck\*/PEFRDg.i*

965

966  
967  
968  
969

Figure 6

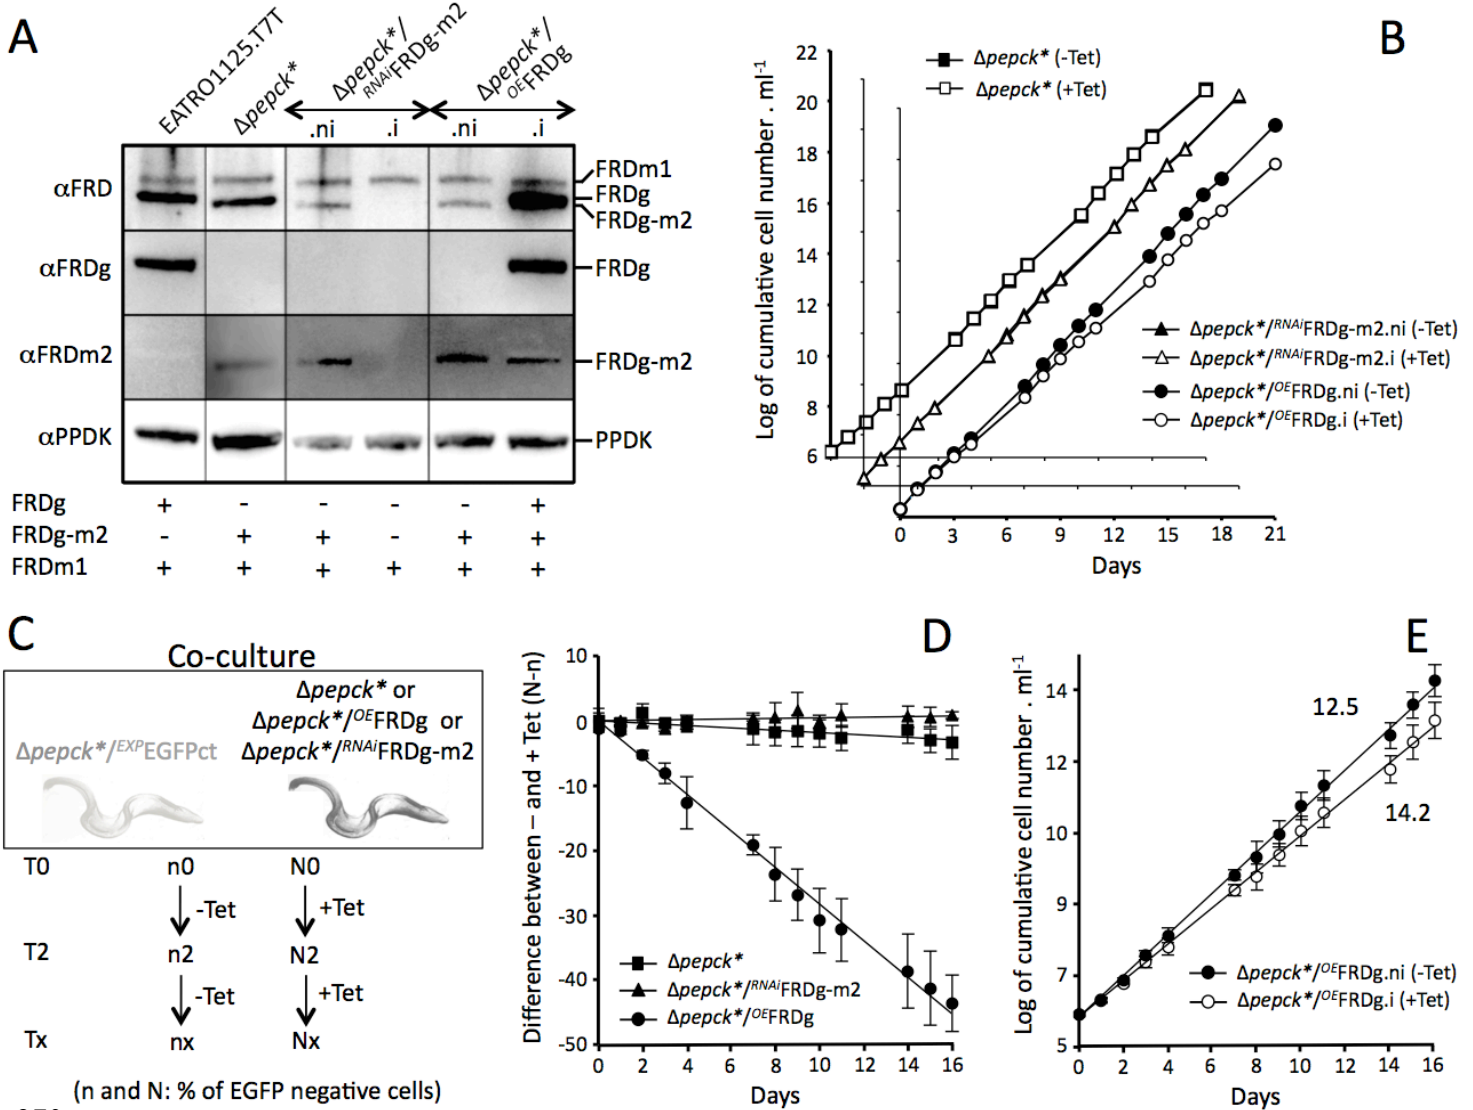

970  
971  
972  
973  
974  
975



976  
977  
978  
979  
980  
981  
982

Figure 7

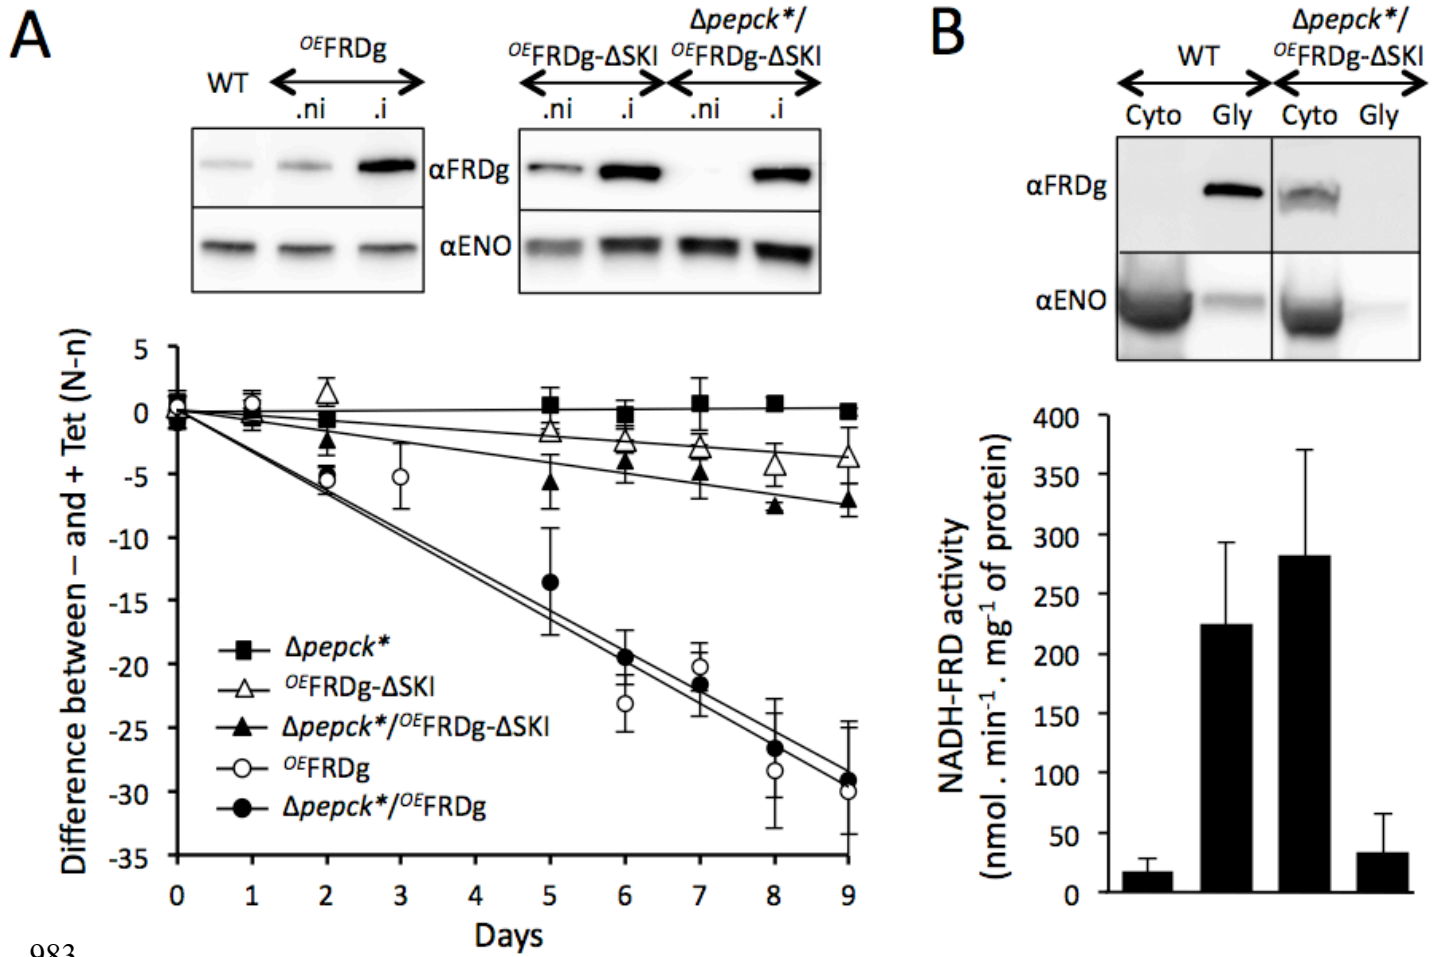

983  
984

985  
986  
987  
988  
989

Figure 8

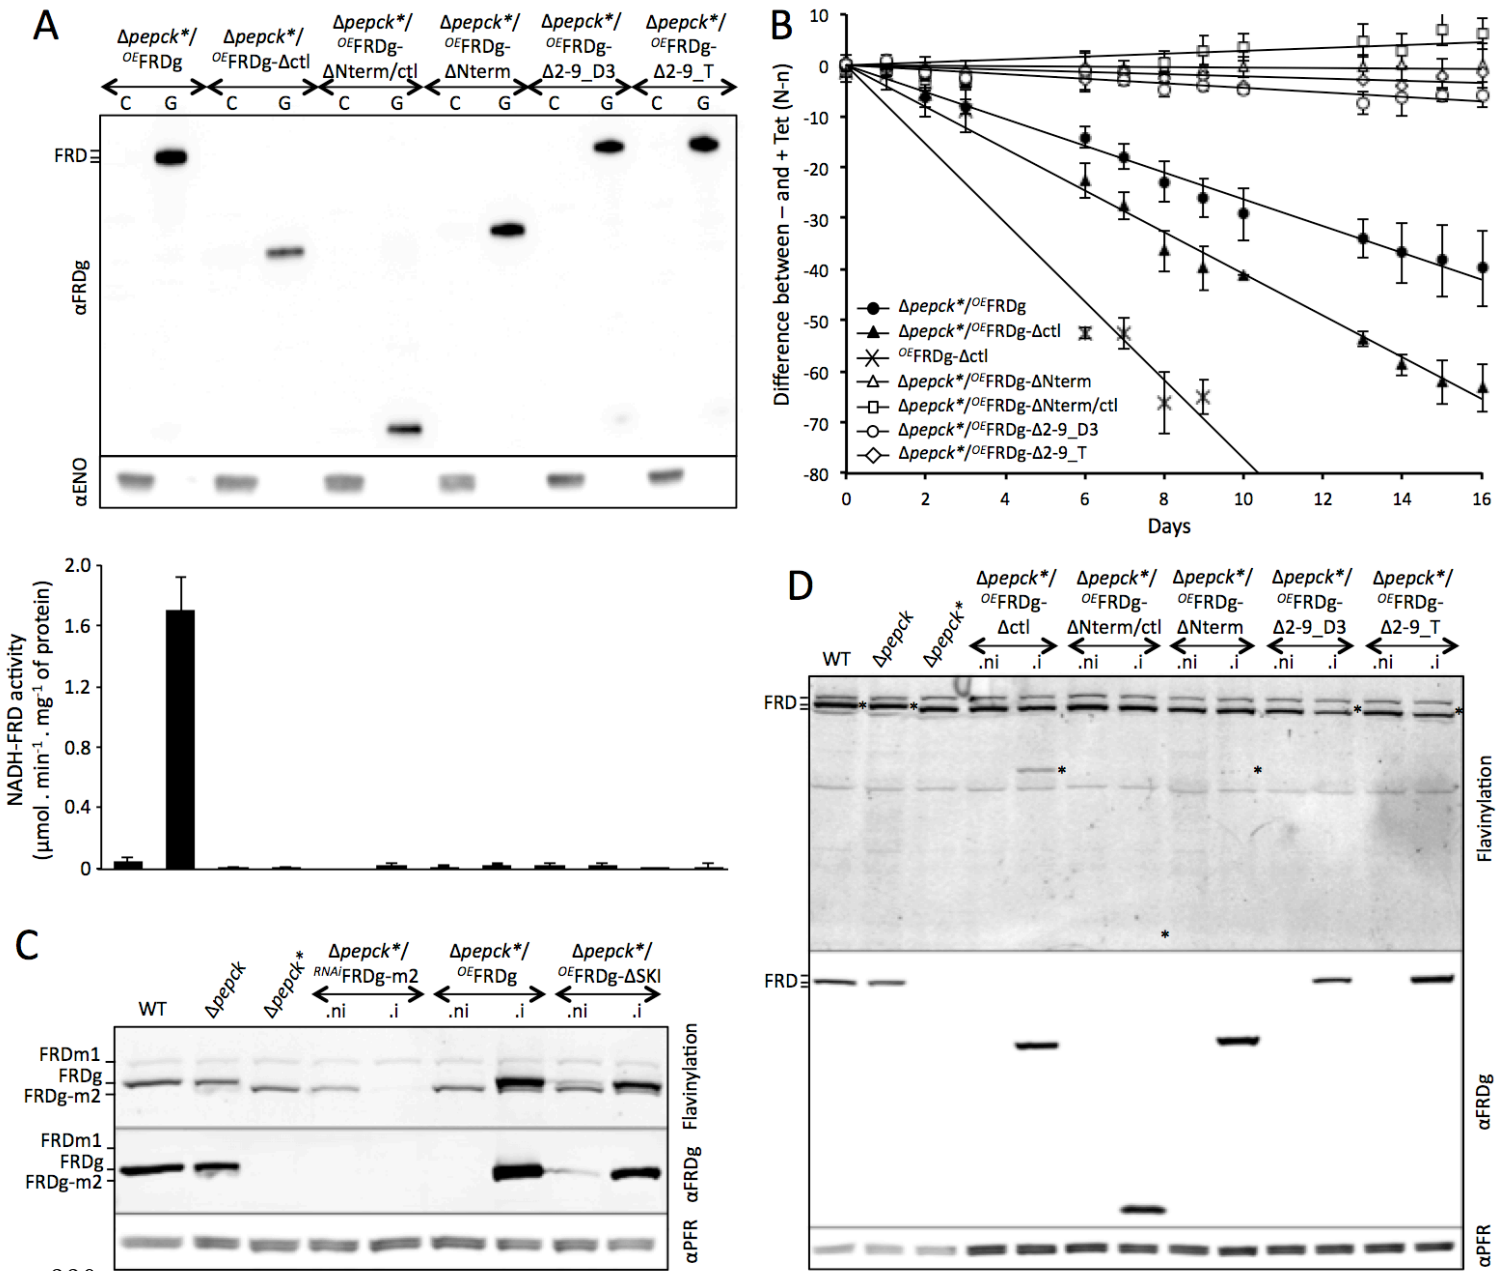

990  
991  
992

993  
994  
995  
996  
997  
998

Figure 9

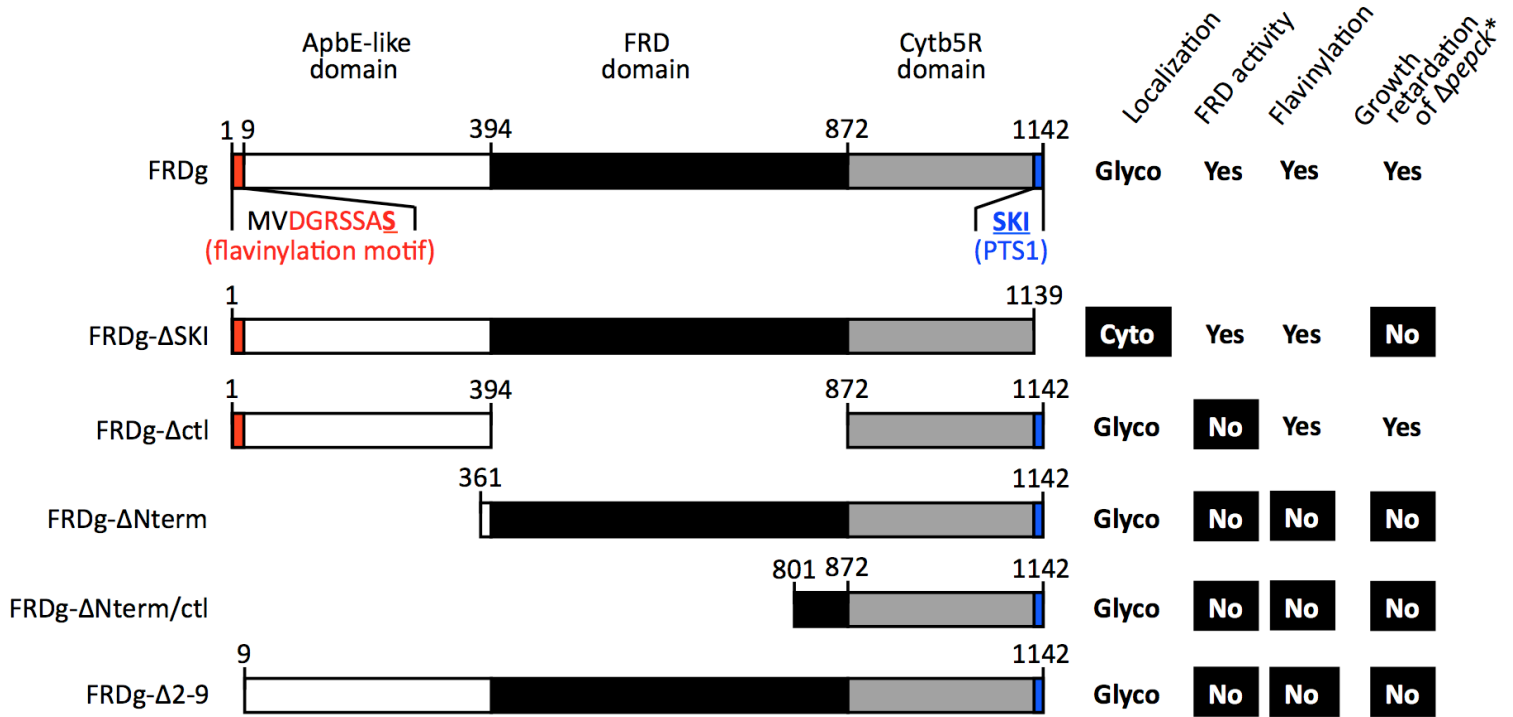

999  
1000

Figure 10

1001  
1002  
1003  
1004  
1005  
1006  
1007  
1008  
1009

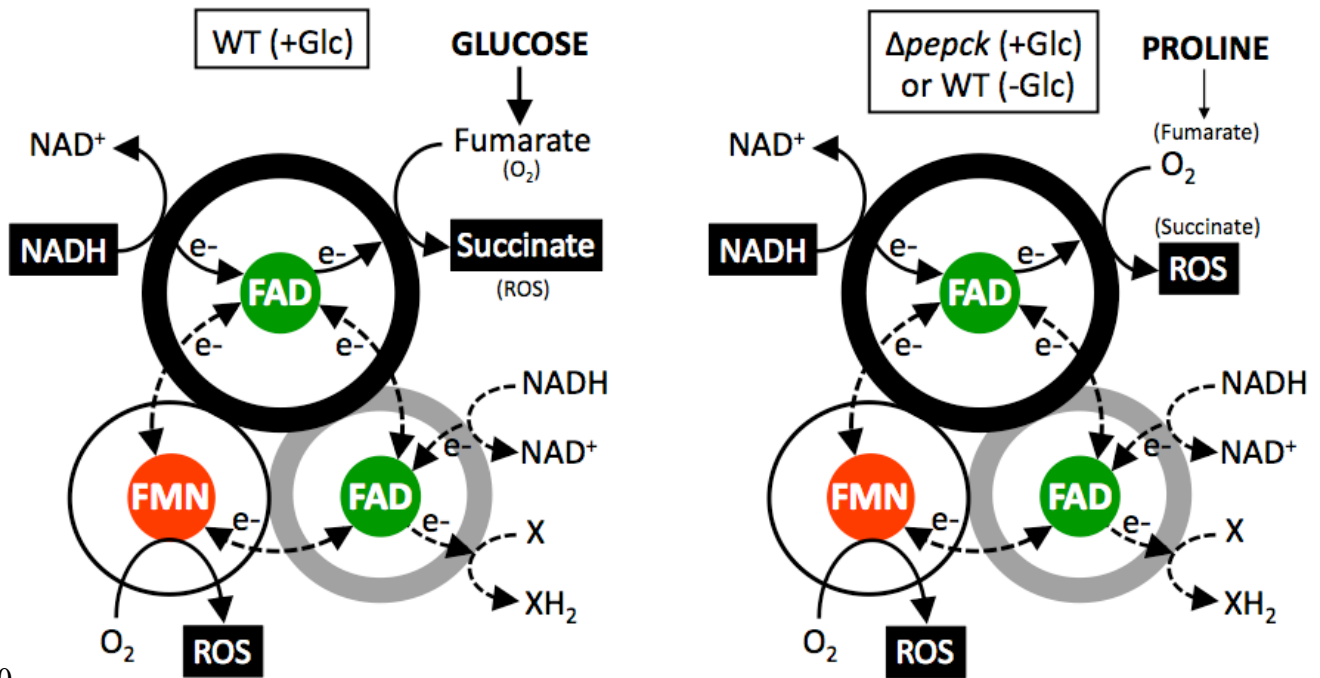

1010  
1011

1012  
1013  
1014  
1015

Figure S1

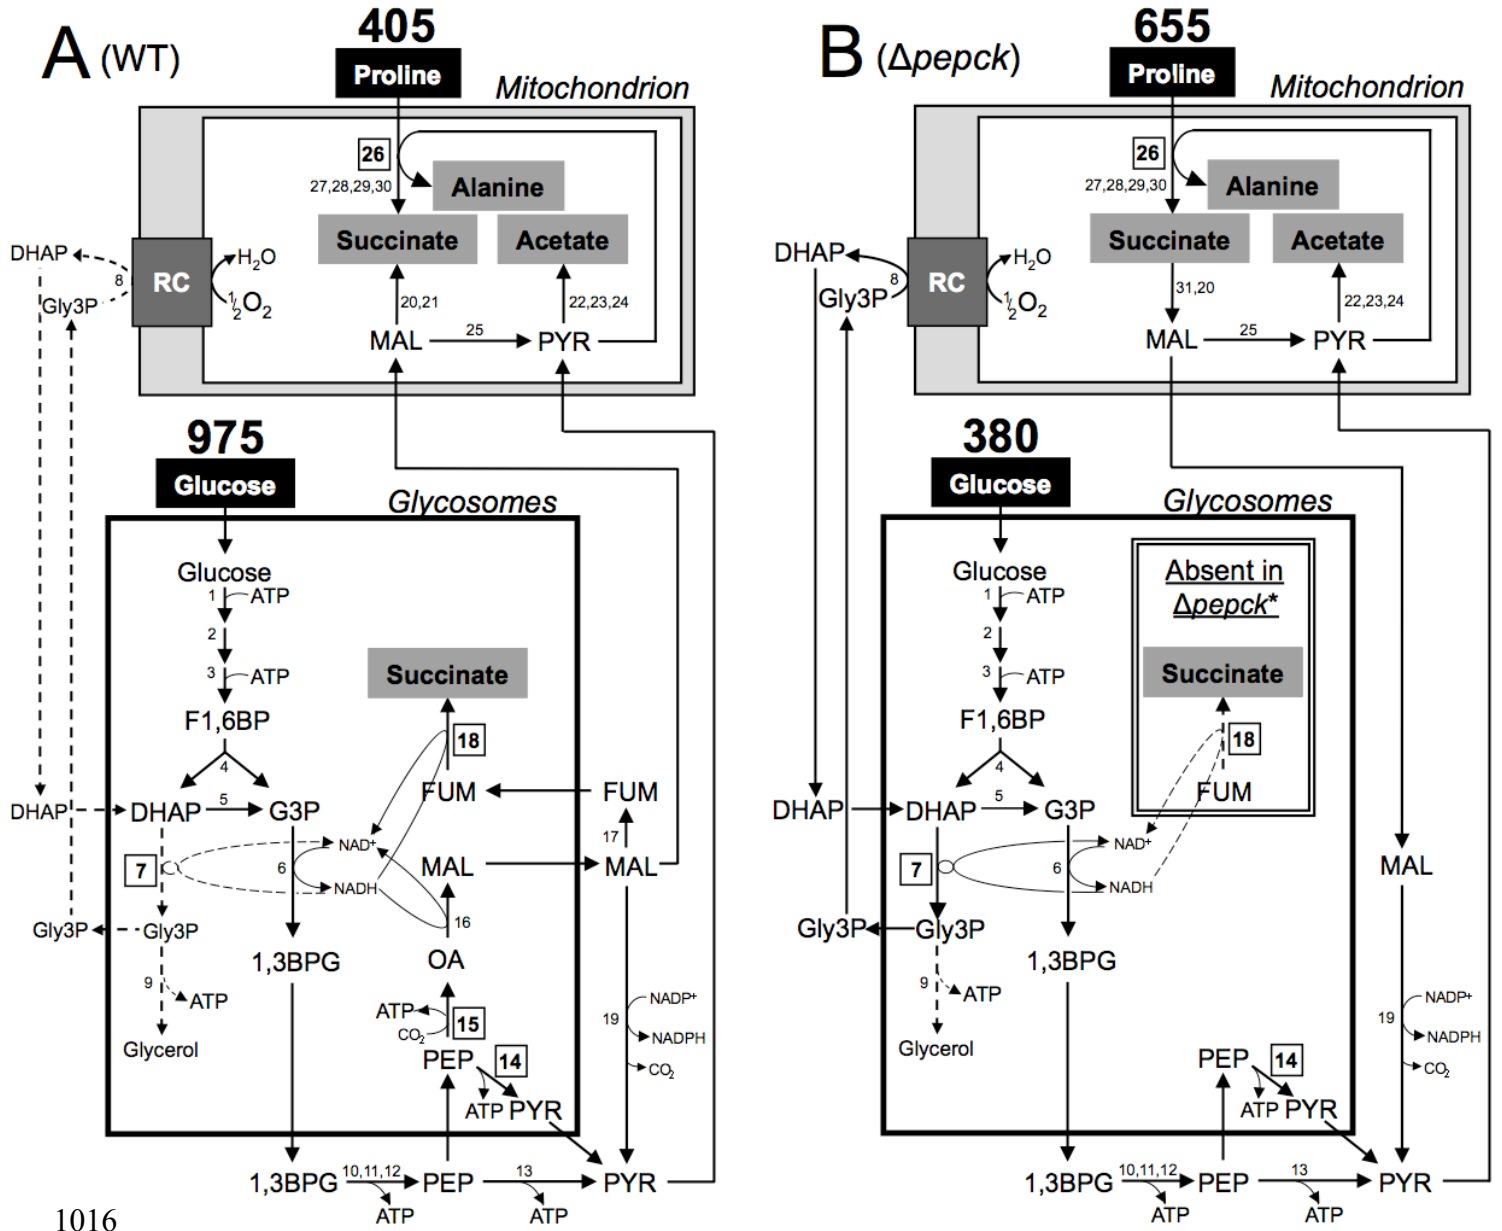

1016  
1017  
1018  
1019

1020 **Fig S1. Schematic representation of the central metabolism of the wild-type and  $\Delta pepck$  mutant**  
1021 **PCF cell lines in glucose-rich medium.** This figure highlights the catalytic steps from glucose and  
1022 proline metabolism in the wild-type (WT) (panel A),  $\Delta pepck$  and  $\Delta pepck^*$  (panel B) cell lines. The  
1023 mitochondrial pathways have been considerably simplified, in particular the respiratory chain (RC)  
1024 represented by a grey box. Excreted end products from degradation of glucose and proline are in a  
1025 grey background and dashed lines represent enzymatic steps not used or used at a background noise  
1026 level. Boxed numbers correspond to the enzymatic steps investigated. The rates of glucose and proline  
1027 consumption ( $\text{nmol h}^{-1} \text{mg}^{-1}$  of protein) indicated above the carbon source names are deduced from  
1028 Tables S1 and are consistent with previous data (18). The double box inside the glycosomes including  
1029 the FRDg step is missing in the  $\Delta pepck^*$  cell line. Abbreviations: 1,3BPG, 1,3-biphosphoglycerate;  
1030 DHAP, dihydroxyacetone phosphate; F1,6BP, fructose 1,6-bisphosphate; FUM, fumarate; G3P,  
1031 glyceraldehyde 3-phosphate; Gly3P, glycerol 3-phosphate; MAL, malate; OA, oxaloacetate; PEP,  
1032 phosphoenolpyruvate; PYR, pyruvate; RC, respiratory chain. Enzymes: 1, hexokinase; 2, glucose-6-  
1033 phosphate isomerase; 3, phosphofructokinase; 4, aldolase; 5, triose-phosphate isomerase; 6,  
1034 glyceraldehyde-3-phosphate dehydrogenase; 7, glycosomal NADH-dependent glycerol-3-phosphate  
1035 dehydrogenase (GPDH); 8, mitochondrial FAD-dependent glycerol-3-phosphate dehydrogenase  
1036 (GPDH); 9, glycerol kinase; 10, phosphoglycerate kinase; 11, phosphoglycerate mutase; 12, enolase;  
1037 13, pyruvate kinase; 14, pyruvate phosphate dikinase (PPDK); 15, phosphoenolpyruvate  
1038 carboxykinase (PEPCK); 16, glycosomal malate dehydrogenase; 17, fumarase; 18, glycosomal  
1039 NADH-dependent fumarate reductase (FRDg); 19, cytosolic malic enzyme; 20, mitochondrial malate  
1040 dehydrogenase; 21, mitochondrial NADH-dependent fumarate reductase (FRDm1); 22, pyruvate  
1041 dehydrogenase complex; 23, acetate:succinate CoA-transferase; 24, acetyl-CoA thioesterase; 25,  
1042 mitochondrial malic enzyme; 26, proline dehydrogenase (PRODH); 27, pyrroline-5 carboxylate  
1043 dehydrogenase; 28, alanine aminotransferase; 29,  $\alpha$ -ketoglutarate dehydrogenase complex; 30,  
1044 succinyl-CoA synthetase; 31, succinate dehydrogenase.  
1045  
1046  
1047

Figure S2

1048  
1049  
1050  
1051  
1052

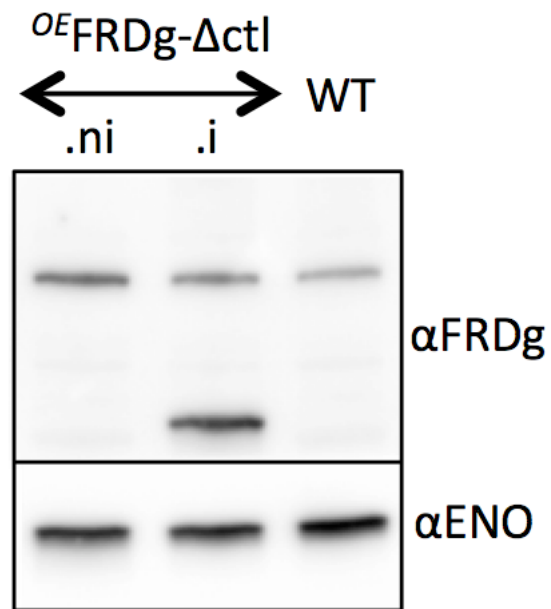

1053  
1054  
1055  
1056  
1057

**Fig S2. Expression of FRDg- $\Delta$ ctl in the parental (WT) background.**
